# Supplementary material for: ElectrochemicalN-demethylation of tropane alkaloids
Source: Royal Society of Chemistry journal article supplement (doi:10.1039/d0gc00851f), 2020-01-01
Supplement: d0gc00851f1.pdf [file d0gc00851f1.pdf]

## Electrochemical N-demethylation of tropane alkaloids

Ali Alipour Najmi <sup>a</sup>, Zhangping Xiao <sup>b</sup>, Rainer Bischoff <sup>a</sup>, Frank J. Dekker <sup>b</sup>, Hjalmar P. Permentier <sup>a\*</sup>

<sup>a</sup> Department of Analytical Biochemistry, Groningen Research Institute of Pharmacy, University of Groningen, A Deusinglaan 1, 9713 AV Groningen, The Netherlands

<sup>b</sup> Chemical and Pharmaceutical Biology, Groningen Research Institute of Pharmacy (GRIP), University of Groningen, Groningen, the Netherlands

### Supporting Information

|                                                        |    |
|--------------------------------------------------------|----|
| Introduction.....                                      | 2  |
| Experimental section.....                              | 3  |
| LC-MS chromatograms.....                               | 6  |
| <sup>1</sup> H, <sup>13</sup> C NMR and HRMS data..... | 10 |
| <sup>1</sup> H and <sup>13</sup> C NMR spectra.....    | 20 |

## Introduction

**Table S1 Conditions and advantages/disadvantages of different catalytic methods for the N-demethylation of tropane alkaloids (References order is based on the main manuscript).**

| Ref.                           | Catalyst                                                               | Temp.    | Solvent                                  | Yield %                              | Oxidant                                                    | Time   | Disadvantages                                                                                                                                                                             | Advantages                                                                                   |
|--------------------------------|------------------------------------------------------------------------|----------|------------------------------------------|--------------------------------------|------------------------------------------------------------|--------|-------------------------------------------------------------------------------------------------------------------------------------------------------------------------------------------|----------------------------------------------------------------------------------------------|
| [9]                            | NA                                                                     | RT       | Chloroform                               | 90.5 (noratropine)                   | 2,2,2-Trichloroethyl chloroformate 5 equiv.                | 20 h   | 1) A carbamate intermediate is produced which needs to be cleaved. 2) Very toxic oxidant. 3) Toxic solvent. 4) Long time. 5) Requires 8.8 equiv. of Zn dust                               | 1) High yield                                                                                |
| [10]                           | NA                                                                     | RT       | Chloroform                               | 100 (noratropine)                    | $\alpha$ -chloroethyl chloroformate 5 equiv.               | 4 h    | 1) A carbamate intermediate is produced which needs to be cleaved. 2) Very toxic oxidant. 3) Toxic solvent. 4) Requires 10.2 equiv. of sodium hydrogen carbonate                          | 1) Excellent yield                                                                           |
| [10]                           | NA                                                                     | 30       | Water (0.5 M sulfuric acid)              | 79.8 (norscopolamine)                | KMnO <sub>4</sub> 2.5 equiv.                               | 1 h    | 1) Toxic and hazardous oxidant. 2) Requires 2.5 equiv. of oxidants                                                                                                                        | 1) Only water as solvent                                                                     |
| [11]                           | NA                                                                     | RT       | Water                                    | 16.8 (noratropine)                   | KMnO <sub>4</sub> 2 equiv.                                 | 10 min | 1) Toxic oxidant, 2) Very low yield                                                                                                                                                       | 1) Quick reaction. 2) Only water as solvent                                                  |
| [12]                           | Light, Bengal rose, TPP (Photochemistry)                               | RT       | Dichloromethane                          | 66 (noratropine)                     | Photochemical reaction, oxygen and light                   | 6 h    | 1) Toxic solvent. 2) Complex reaction mixture                                                                                                                                             | 1) No toxic oxidants. 2) Medium yield.                                                       |
| [15]                           | FeSO <sub>4</sub> ·7H <sub>2</sub> O 1.5 equiv.                        | RT       | Methanol                                 | 51 (noratropine)                     | Magnesium bis (monoperoxyphthalate) hexahydrate 1.1 equiv. | 45 min | 1) N-oxide formation. 2) HCl isolation. 3) TPPS for iron chelating/separation. 4) Toxic solvent. 5) Low yield                                                                             | 1) No toxic oxidants                                                                         |
| [17]                           | Fe(II)TPPS                                                             | -80-0 °C | Chloroform or methanol                   | 42 (noratropine)                     | H <sub>2</sub> O <sub>2</sub> or m-CPBA                    | NA     | 1) N-oxide formation. 2) Hazardous oxidant, 3) HCl salt isolation, 4) Catalyst separation, 5) Low temperature. 6) Toxic solvent. 7) Low yield                                             | 1) Stabilizing the catalyst by acetate buffer                                                |
| [8]                            | Ferrocene 0.1 equiv.                                                   | 80 °C    | Chloroform and isopropanol               | 60 (noratropine)                     | H <sub>2</sub> O <sub>2</sub> or m-CPBA                    | 24 h   | 1) Toxic catalyst. 2) Hazardous oxidants. 3) Low yield. 4) Toxic solvents in part of the process. 5) Catalyst separation                                                                  | 1) Application of green solvent in part of the process                                       |
| [2]                            | Iron powder 1 equiv.                                                   | RT       | Chloroform                               | 81 (noratropine)                     | H <sub>2</sub> O <sub>2</sub> or m-CPBA                    | 2 h    | 1) N-oxide formation 2) HCl salt isolation. 3) hazardous oxidants. 4) toxic solvents. 5) catalyst separation                                                                              | 1) High yield                                                                                |
| [18]<br>Green Chemistry        | Iron nanoparticles (FeSO <sub>4</sub> and NaBH <sub>4</sub> ) 1 equiv. | RT       | Chloroform and isopropanol               | 85 (noratropine)                     | m-CPBA 1.2 equiv.                                          | 3 h    | 1) toxic sodium borohydride for nanoparticle synthesis. 2) N-oxide formation 3) HCl salt isolation 4) hazardous oxidant. 5) Catalyst separation. 6) Toxic solvent in part of the process. | 1) High yield. 2) Application of isopropanol in part of the process                          |
| [18]<br>Green Chemistry        | Fe <sub>3</sub> (CO) <sub>12</sub> 0.05 equiv.                         | RT       | Chloroform and isopropanol/ethyl acetate | 79 (noratropine)                     | m-CPBA 1.2 equiv.                                          | 19 h   | 1) Dangerous catalyst. 2) N-oxide formation. 3) HCl salt isolation. 4) Hazardous oxidants 3) Long reaction time. 4) Toxic solvent in part of the reaction                                 | 1) Medium yield. 2) Application of isopropanol in part of the reaction. 3) Low catalyst load |
| [3] and [6]<br>Green Chemistry | Fe(II)-TAML 0.1 equiv.                                                 | RT       | Ethanol Acetone DMSO                     | 75 (noratropine) 77 (norscopolamine) | H <sub>2</sub> O <sub>2</sub> , 50 equiv.                  | 1 h    | 1) Deactivating of H <sub>2</sub> O <sub>2</sub> by MnO <sub>2</sub> . 2) Very high equivalent of H <sub>2</sub> O <sub>2</sub>                                                           | 1) Application of green solvent. 2) High yield. 3) Low catalyst load                         |

## Experimental section

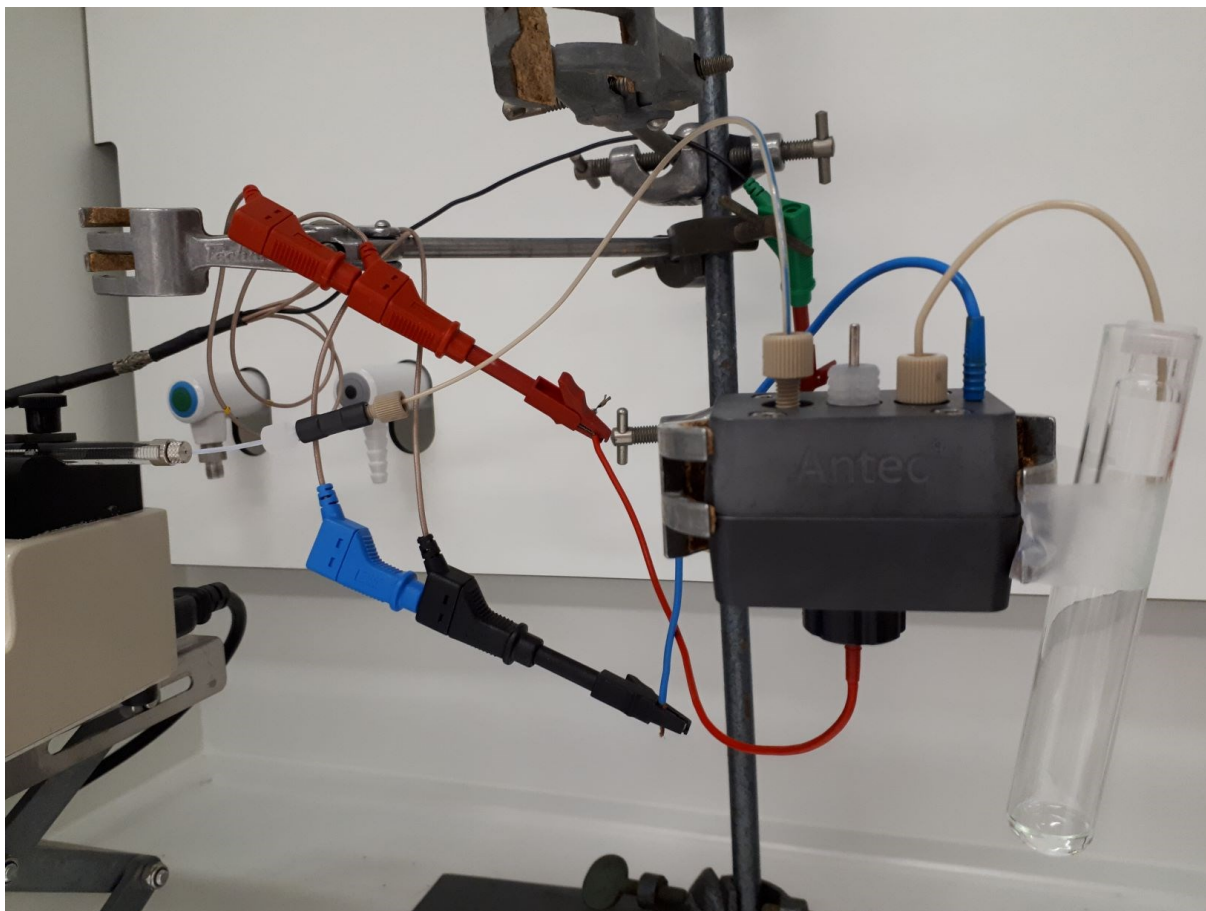

Fig S1, Set-up of the analytical electrochemical flow-cell ( $\mu$ -PrepCell, Antec Scientific)

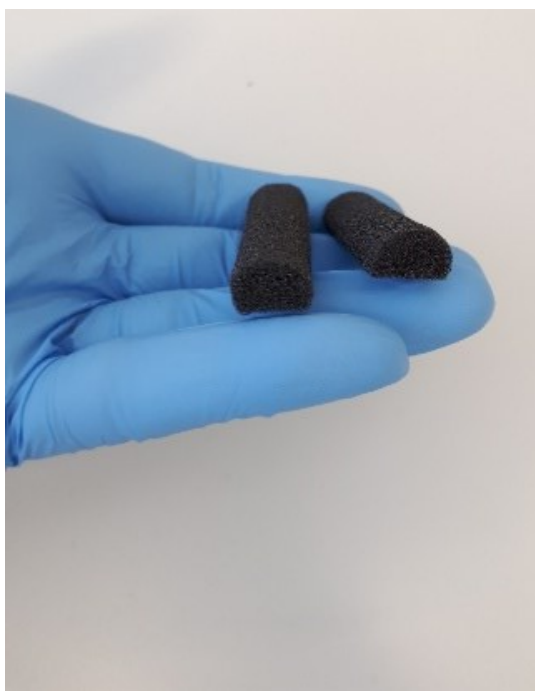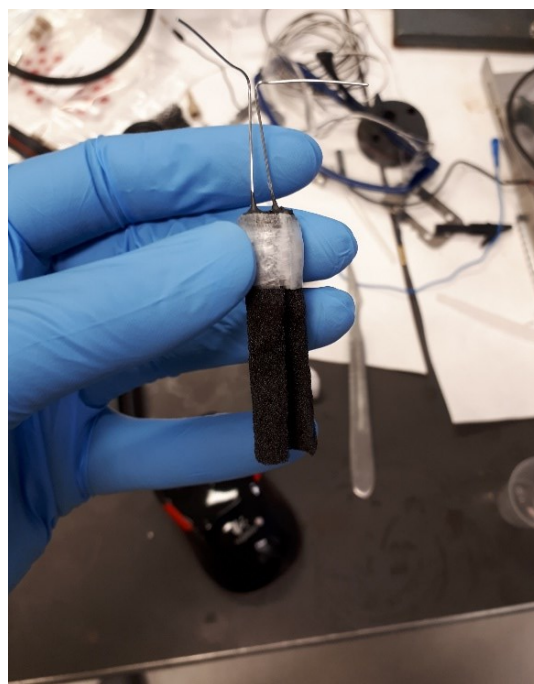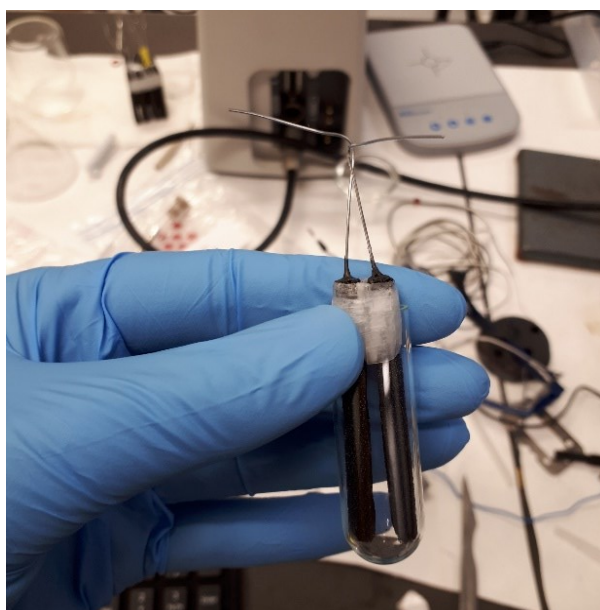

Fig S2, Set-up of the home-made electrochemical cell using a 100 PPI GC electrode, a stainless steel wire and a half-cut glass test tube

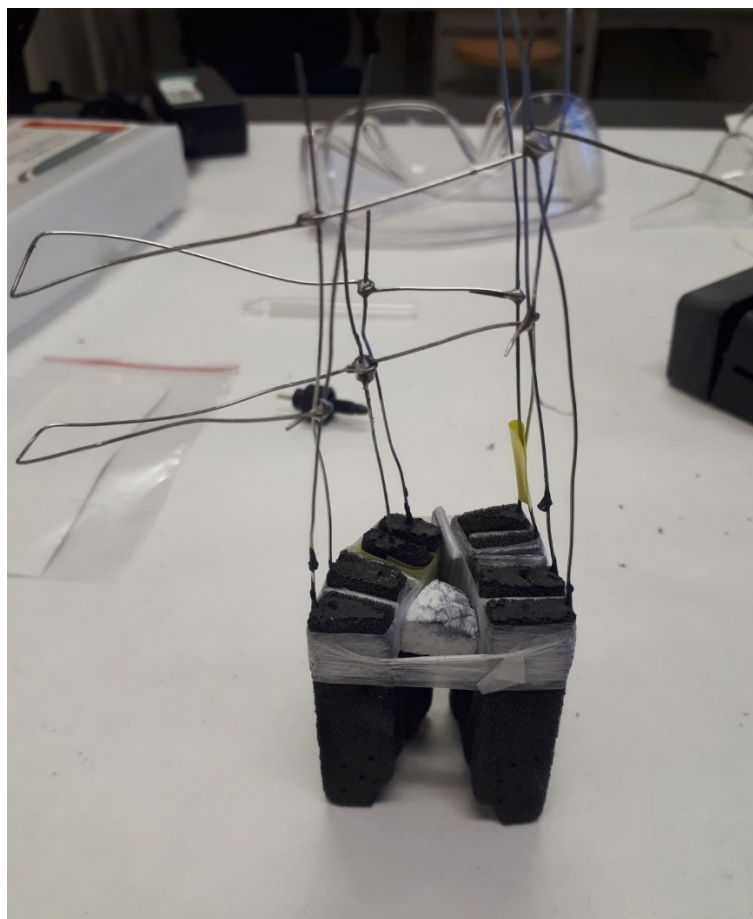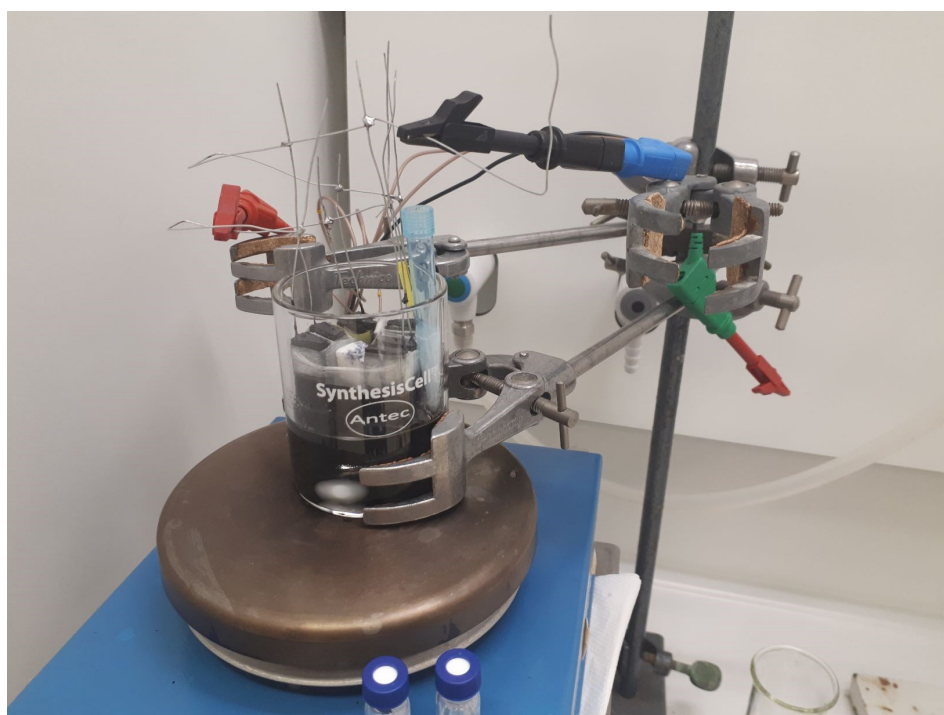

Fig S3, Home-made electrochemical cell with a stack of four paired anode-cathode electrodes for gram-scale synthesis

### LC-MS chromatograms

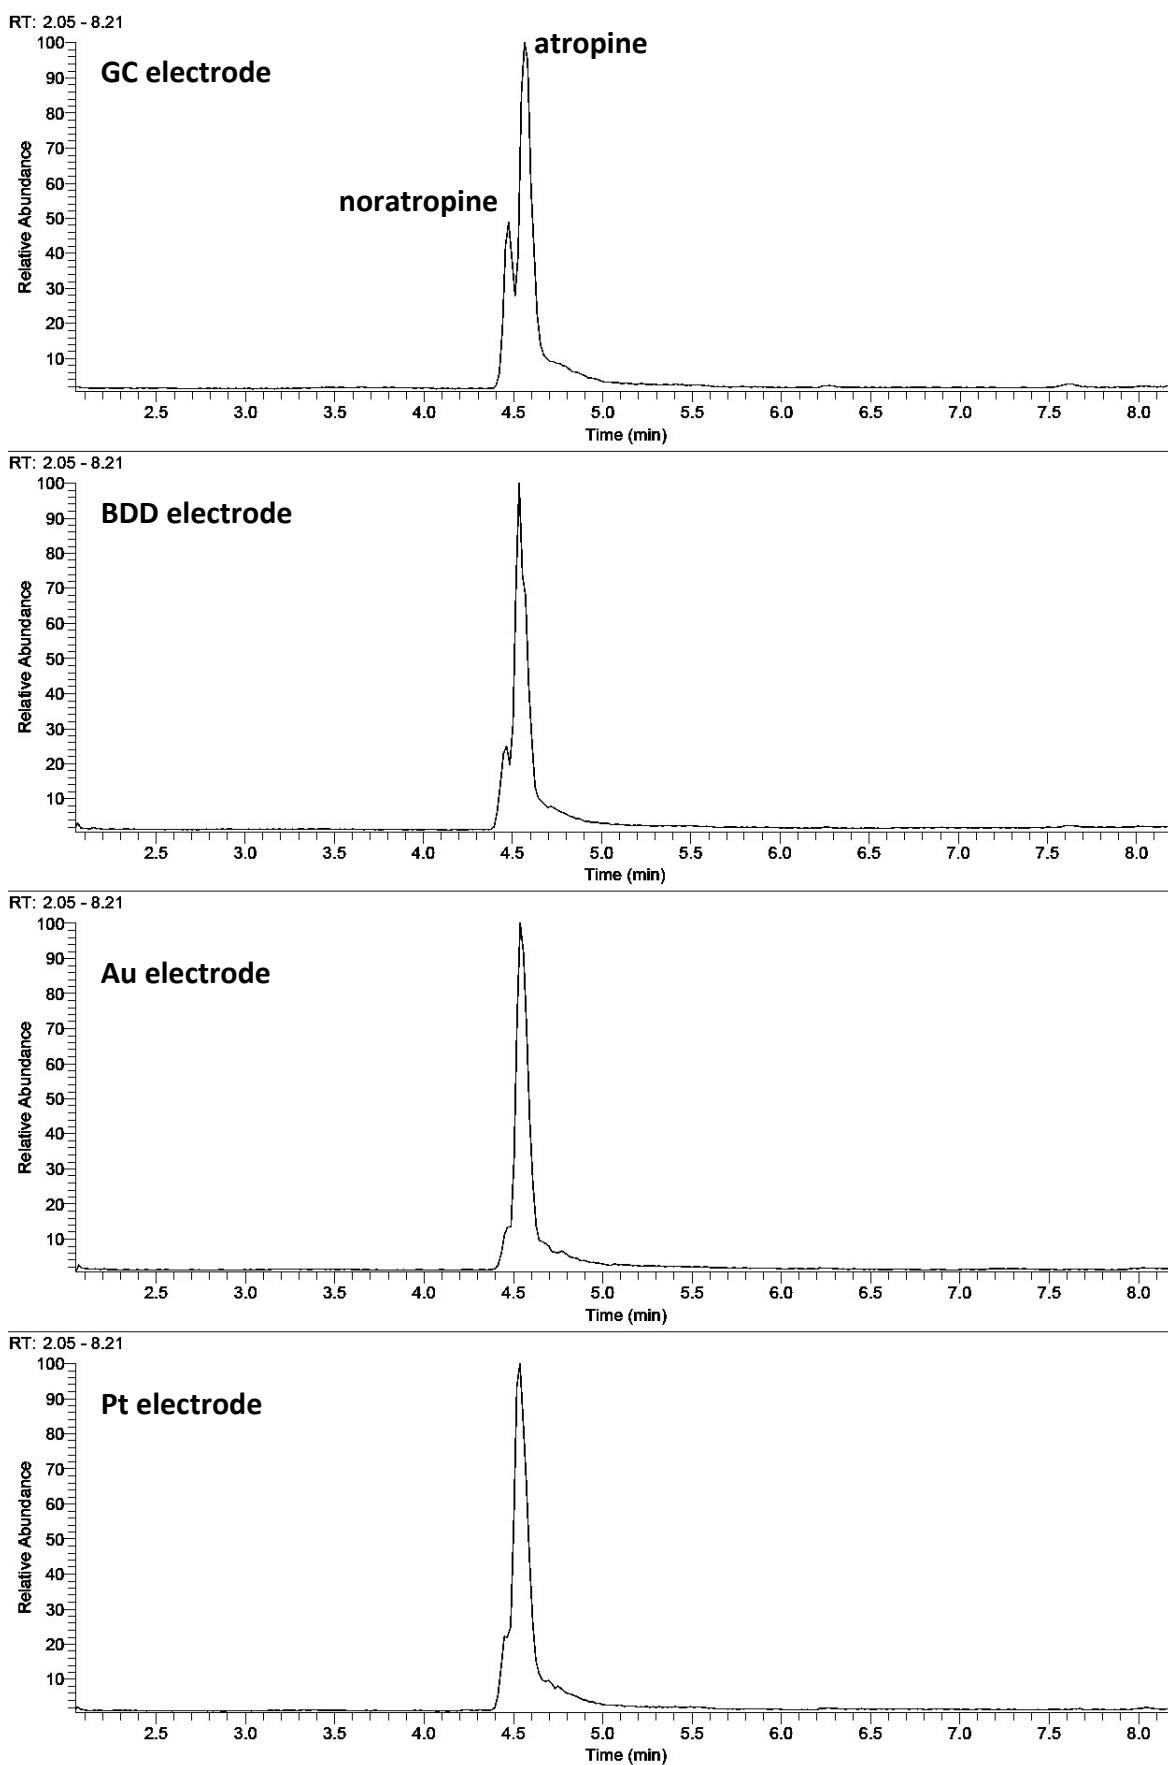

Fig S4, LC-MS chromatogram of flow-cell experiment with different electrode materials. Reaction condition: 10 mM, 5  $\mu$ L/min, 200  $\mu$ A, ethanol, NaClO<sub>4</sub> (4 equivalent).

RT: 1.92 - 9.36

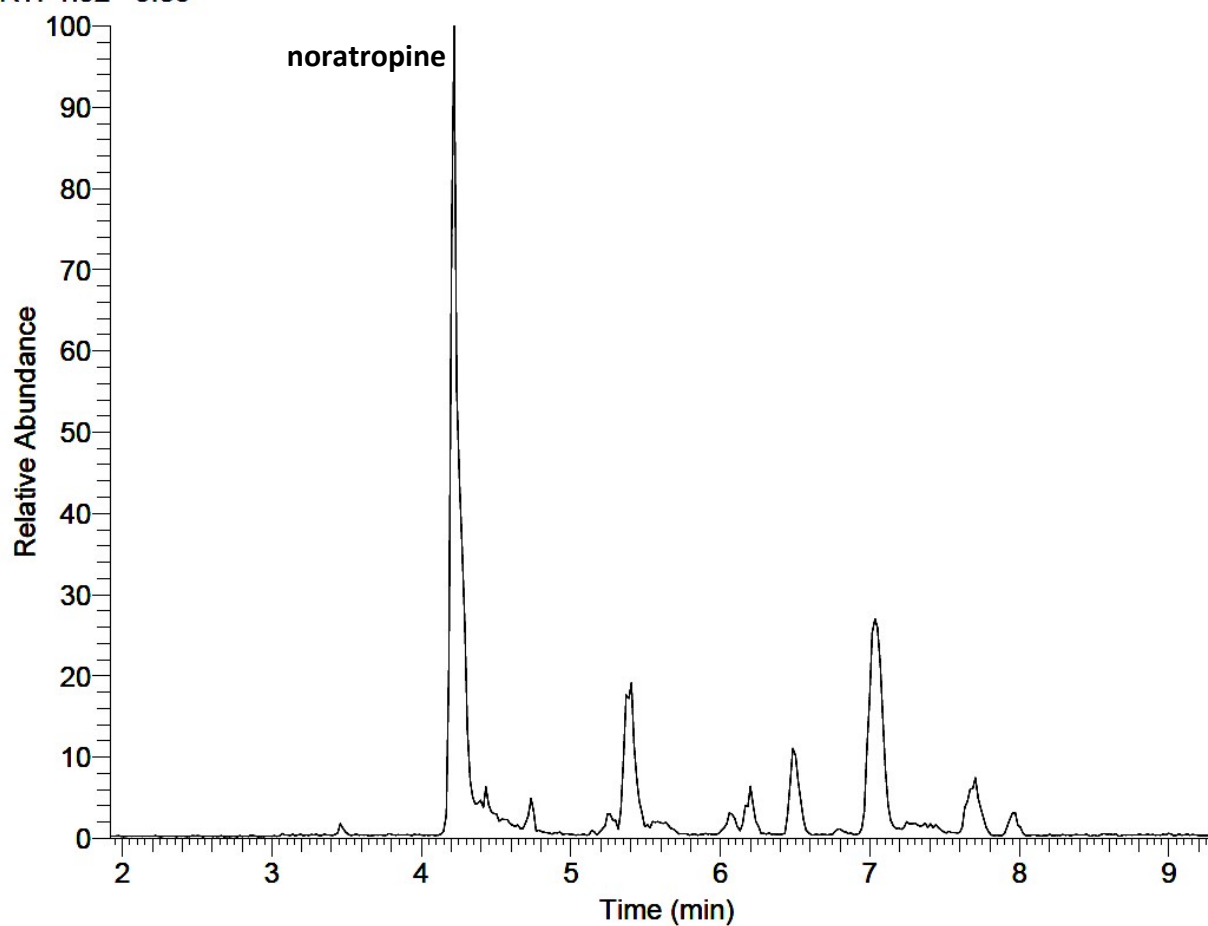

Fig S5, LC-MS chromatogram of final reaction mixture of entry 5, Table 1. 57 mM atropine, ethanol/water 2:1, 8 mA/3 h.

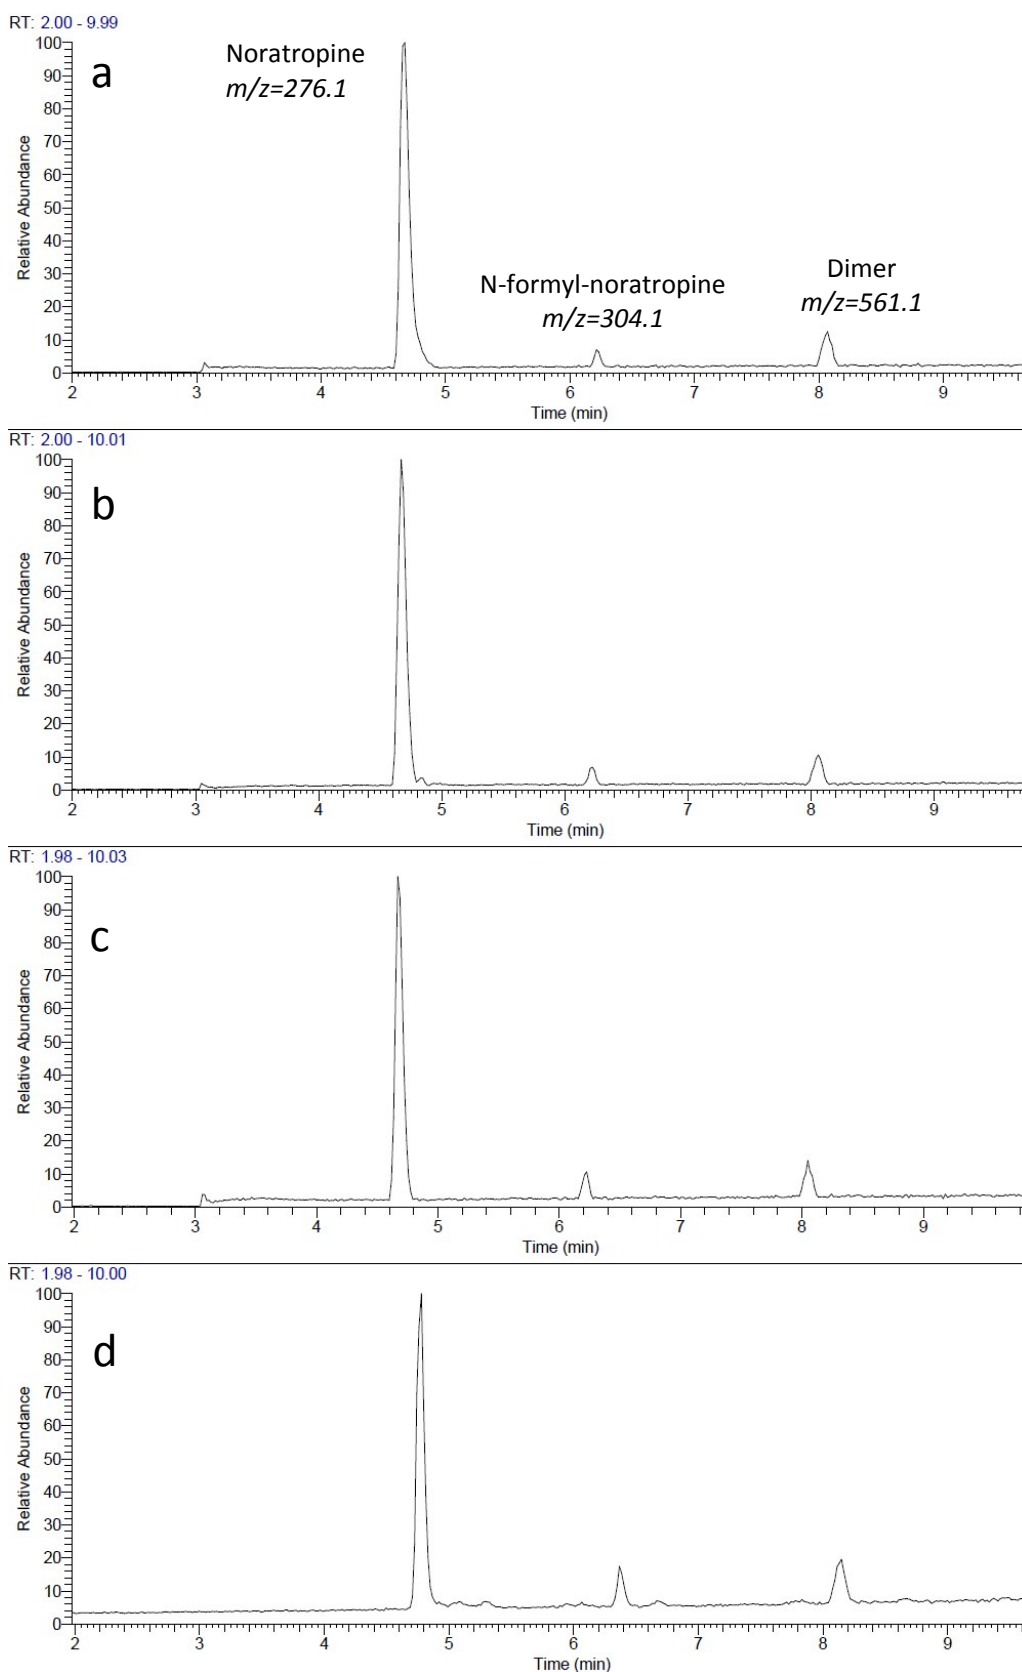

Fig S6, LC-MS chromatogram of final reaction mixture in four different conditions, entry 9-12, Table 1 (panels a-d, respectively).

57 mM atropine, ethanol/water 2:1, 4 mA/4.5 h.



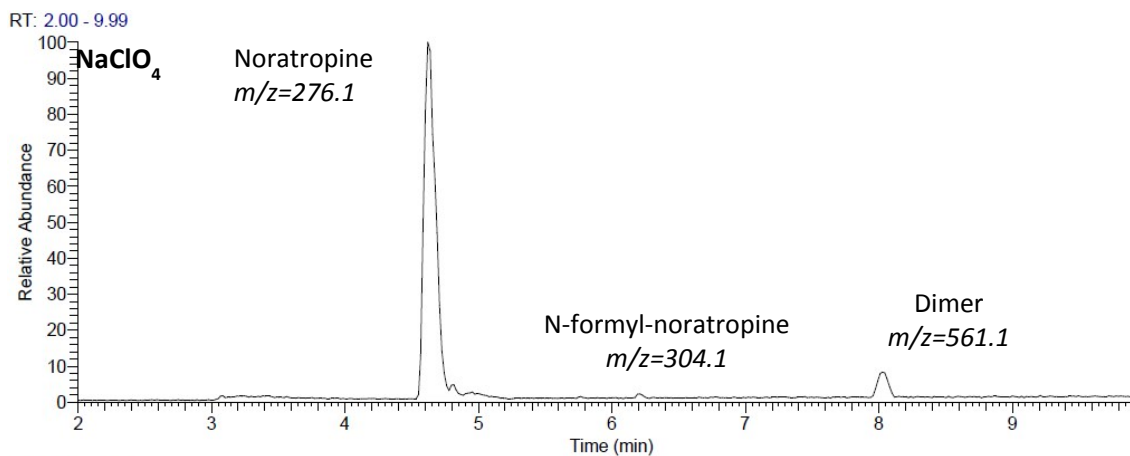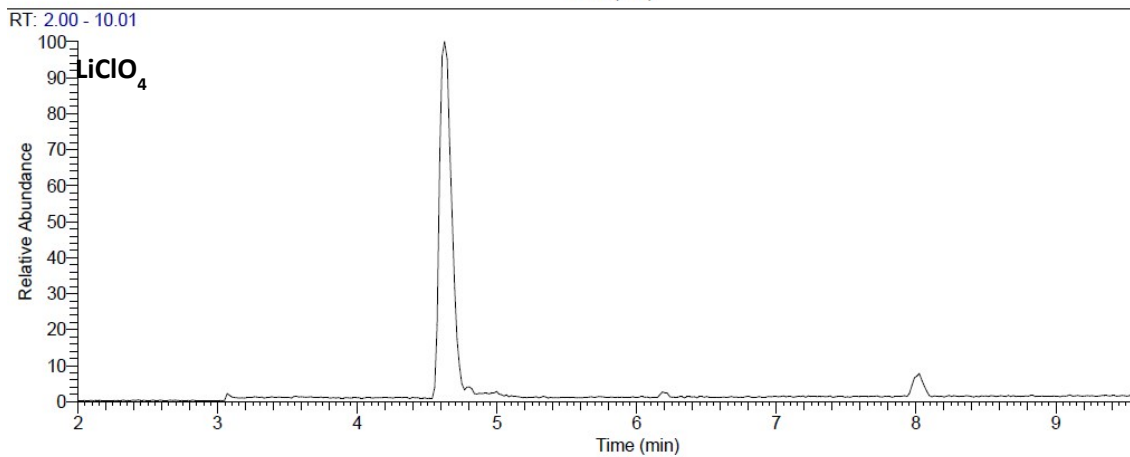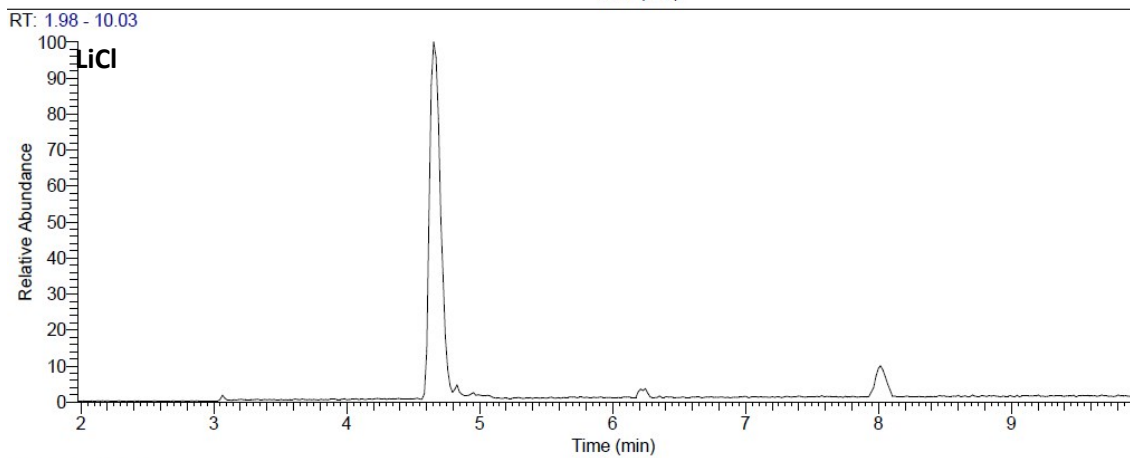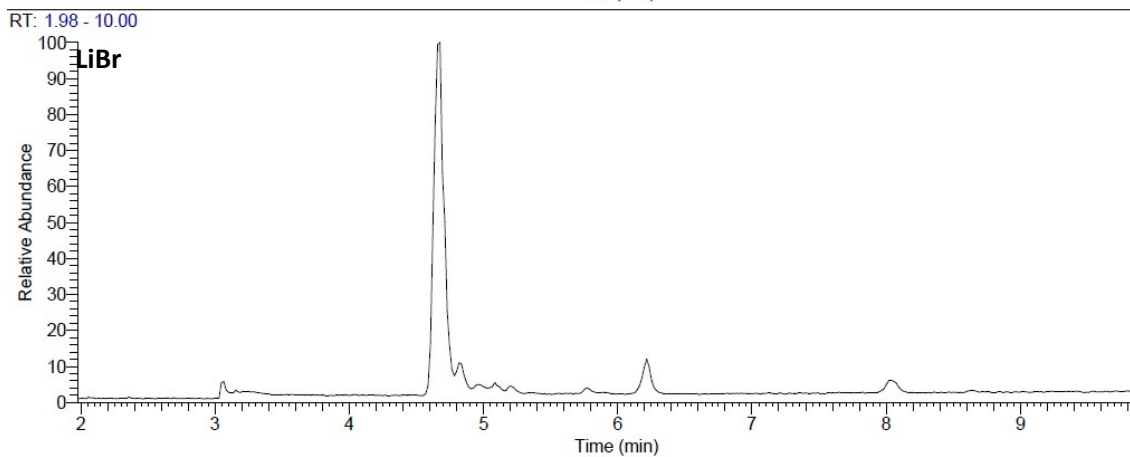

Fig S7, LC-MS chromatogram of final reaction mixture with four different supporting electrolytes, entry 1-4, Table 3. 57 mM atropine, methanol/water 2:1.

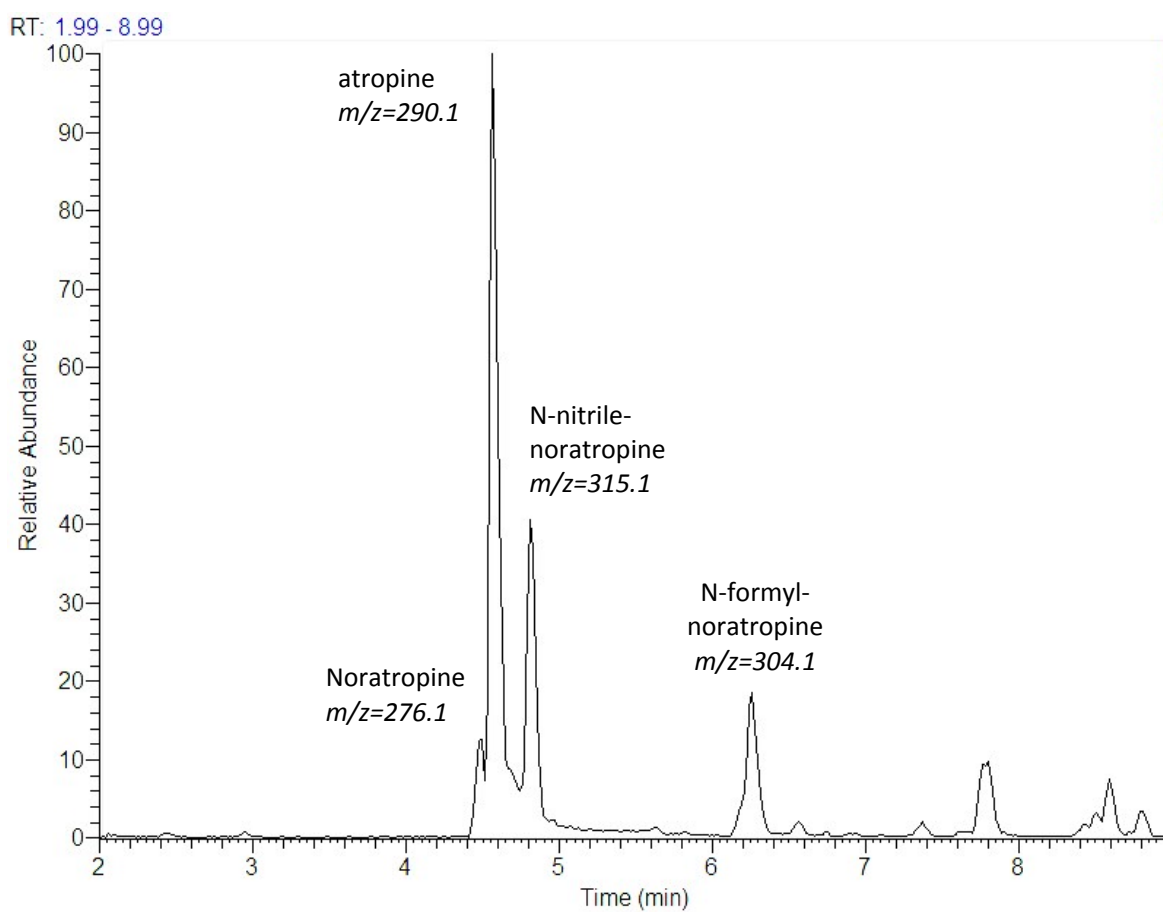

Fig S8, LC-MS chromatogram of flow-cell experiment with added KCN. Reaction condition: 10 mM atropine, 1  $\mu$ L/min, 200  $\mu$ A, ethanol/water 1:1, NaClO<sub>4</sub> (4 equivalent), KCN (4 equivalent).

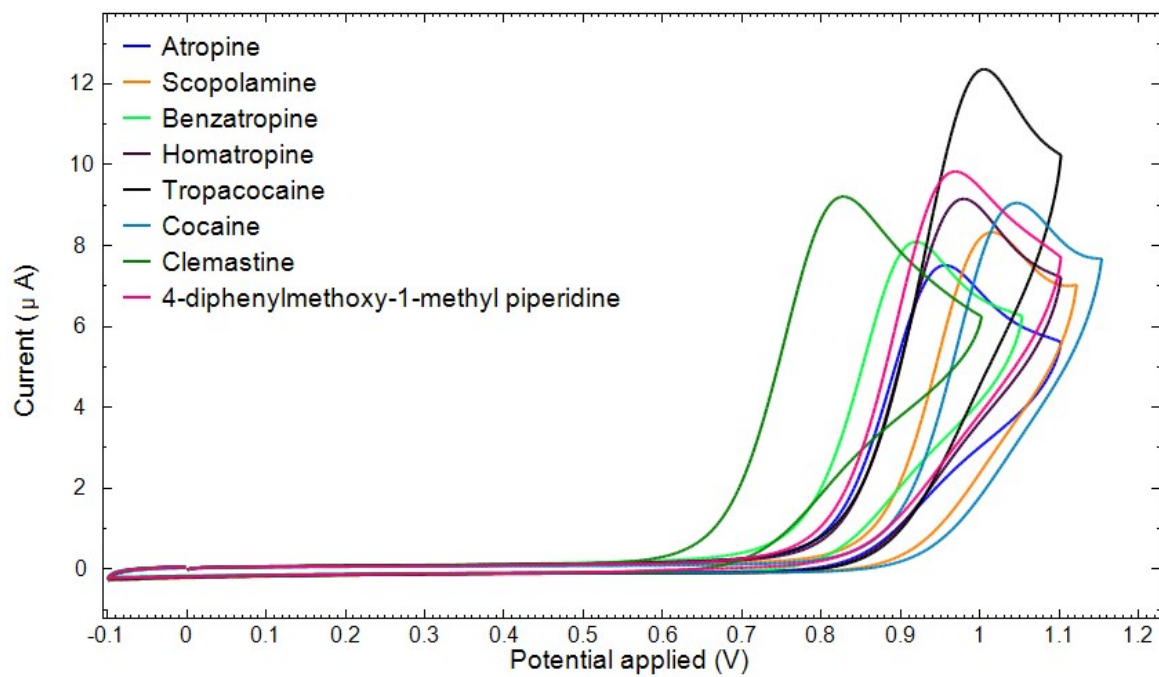

Fig S9, Cyclic voltammetry of different compounds (5 mM) in ethanol/water (2:1) with  $\text{NaClO}_4$  (0.1 M) as supporting electrolyte, glassy carbon both as working and counter electrodes, scan rate = 100 mV/s.

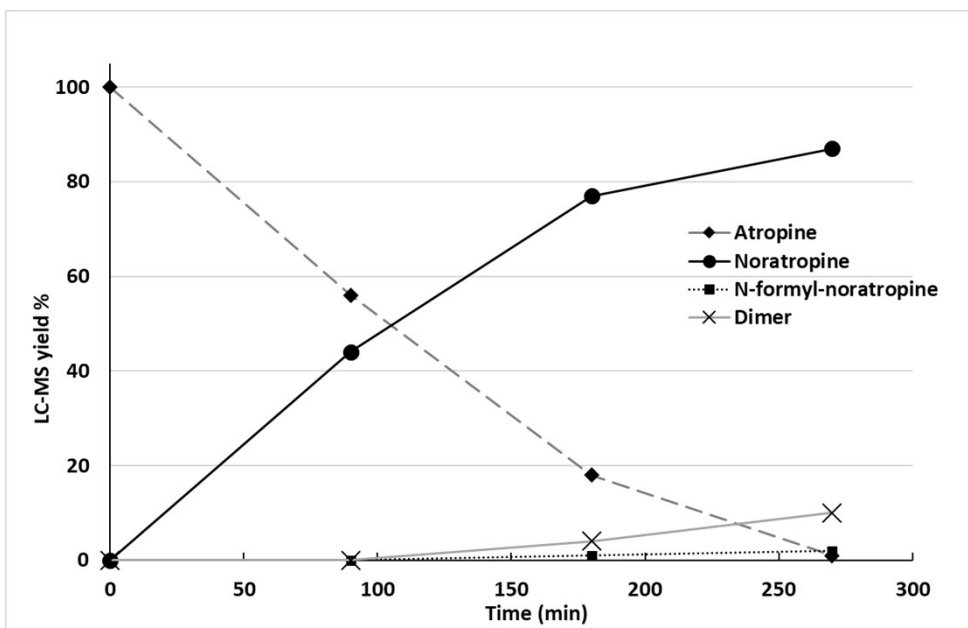

Fig S10, Product distribution during the reaction period for the electrochemical N-demethylation of atropine (Table 2, entry 10).

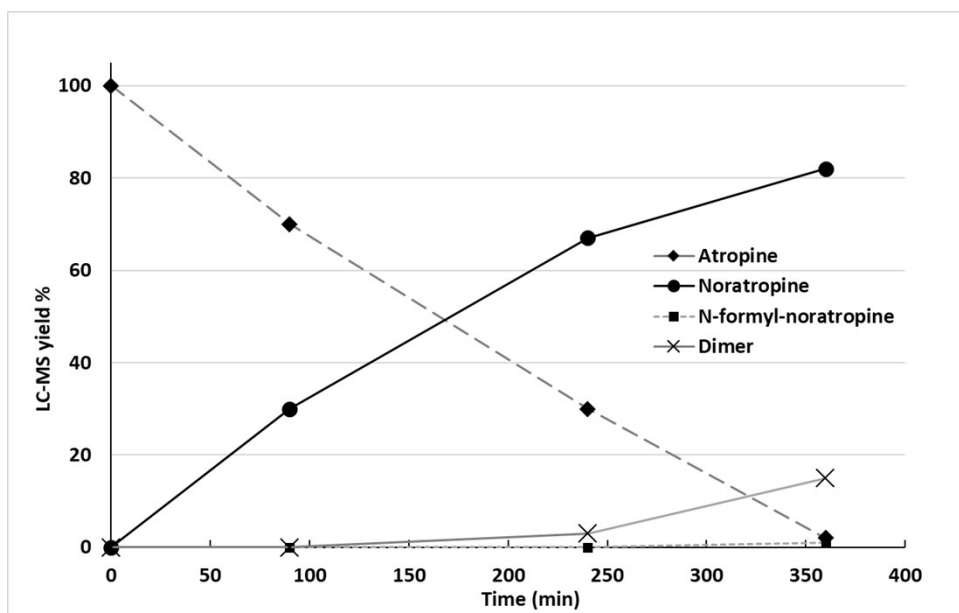

Fig S11, Product distribution during the reaction period for the electrochemical N-demethylation of atropine in gram-scale (Table 4, entry 2).

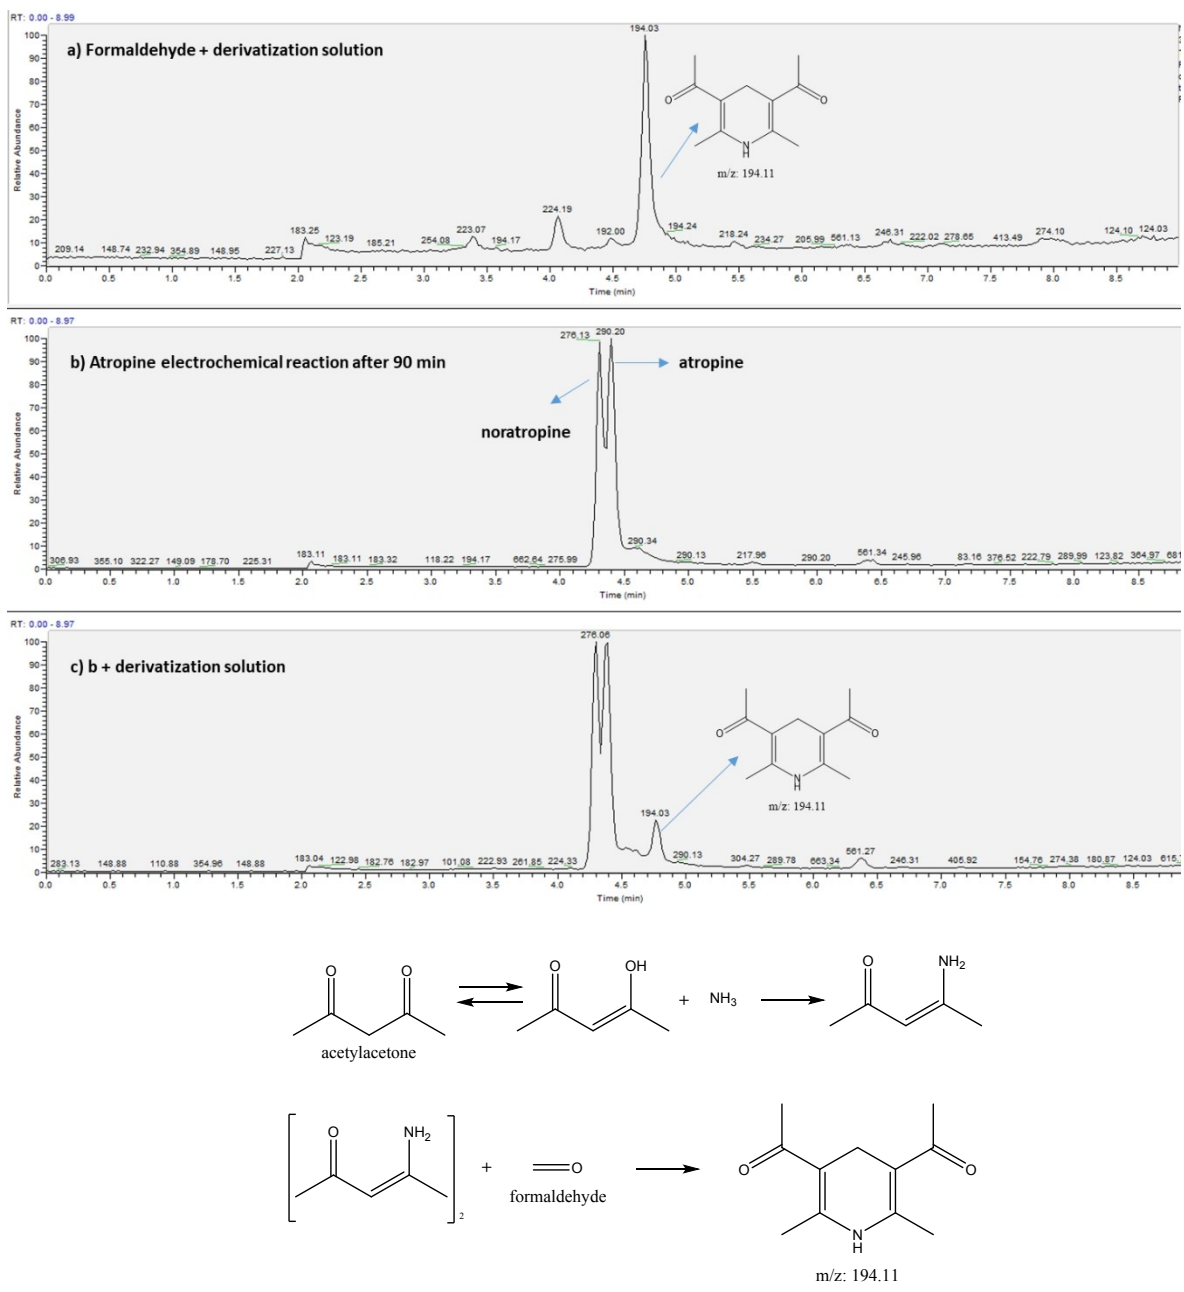

Fig S12, LC-MS chromatogram and reaction scheme of the derivatization reaction of formaldehyde in the reaction solution.

Table S2, electrochemical N-demethylation of atropine to noratropine using another set of electrodes. 50 mg atropine, 3 mL, ethanol, NaClO<sub>4</sub> (4 equiv.) (the same condition as Table 2, entry 9-12)

| Entry | Current/time | Added water      | Conversion (%) <sup>a</sup> | Yield (%)       |
|-------|--------------|------------------|-----------------------------|-----------------|
| 1     | 4 mA / 4.1 h | 18.5 M (33% v/v) | 99                          | 74 <sup>b</sup> |
| 2     | 4 mA / 4.1 h | 18.5 M (33% v/v) | 99                          | 70 <sup>b</sup> |
| 3     | 4 mA / 4.1 h | 18.5 M (33% v/v) | 99                          | 70 <sup>b</sup> |
| 4     | 4 mA / 4.1 h | 18.5 M (33% v/v) | 99                          | 76 <sup>b</sup> |

<sup>a</sup> determined by LC-MS. <sup>b</sup> Isolated yield after 2-step-NH<sub>4</sub>OH-LLE

Table S3, electrochemical N-demethylation of tropacocaine at different pH values.

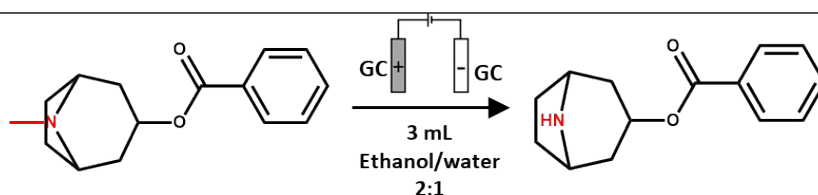

| Entry             | Current/time | Supporting electrolyte (4 equiv.) | Conversion (%) <sup>a</sup> | Yield (%)       | pH <sup>b</sup> |
|-------------------|--------------|-----------------------------------|-----------------------------|-----------------|-----------------|
| 1 <sup>c, d</sup> | 4 mA / 7 h   | NaClO <sub>4</sub>                | 99                          | 70 <sup>e</sup> | 11              |
| 2 <sup>c</sup>    | 4 mA / 4 h   | LiCl                              | 0                           | -               | 4               |
| 3 <sup>f</sup>    | 4 mA / 1 h   | NaClO <sub>4</sub>                | 2                           | -               | 5               |
| 4 <sup>f, g</sup> | 4 mA / 1 h   | NaClO <sub>4</sub>                | 95                          | 81 <sup>h</sup> | 10              |

<sup>a</sup> determined by LC-MS. <sup>b</sup> measured by pH paper. <sup>c</sup> 54 mM. <sup>d</sup> reaction with free amine. <sup>e</sup> isolated yield by 2-step-NH<sub>4</sub>OH LLE. <sup>f</sup> 20 mM. <sup>g</sup> pH increased by adding equimolar amount of sodium carbonate. <sup>h</sup> yield determined by LC-MS.

Table S4, electrochemical N-demethylation of N-methylpiperidine and N-methylpyrrolidine examples.

| Starting compound                                                                                                                       | 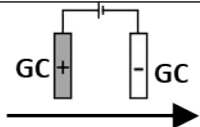<br>60 mg<br>3 mL<br>Ethanol/water (2:1)<br>NaClO <sub>4</sub> (4 equiv.) | Synthesized compound                                                                                                                                                                                                       |
|-----------------------------------------------------------------------------------------------------------------------------------------|------------------------------------------------------------------------------------------------------------------------------------------------------------|----------------------------------------------------------------------------------------------------------------------------------------------------------------------------------------------------------------------------|
| <br>4-diphenylmethoxy-1-methyl<br>piperidine <b>13</b> | 0.96 V <sup>a</sup> 4 mA / 12 h                                                                                                                            | <br>44 % <sup>b</sup>                                                                                                                   |
| <br>Clemastine <b>14</b>                             | 0.82 V <sup>a</sup> 4 mA / 9 h                                                                                                                             | <br>19% <sup>c</sup><br>+<br><br>52% <sup>c</sup> |

<sup>a</sup> electrochemical oxidation potential versus Ag/AgCl. <sup>b</sup> Isolated yield after silica-gel chromatography.

<sup>c</sup> Isolated yield after C18 chromatography.

## $^1\text{H}$ and $^{13}\text{C}$ NMR of compounds

### Noratropine

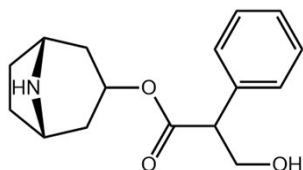

$^1\text{H NMR}$  (500 MHz,  $\text{CDCl}_3$ )  $\delta$  7.41 – 7.25 (m, 5H), 5.07 (t,  $J = 5.2$  Hz, 1H), 4.21 – 4.12 (m, 1H), 3.86 – 3.74 (m, 2H), 3.43 (dt,  $J = 6.8, 3.1$  Hz, 1H), 3.31 (dt,  $J = 6.7, 3.0$  Hz, 1H), 2.45 (br.s, 2H), 2.00 (dddd,  $J = 15.1, 5.3, 3.7, 1.5$  Hz, 1H), 1.96 – 1.83 (m, 2H), 1.74 (dt,  $J = 15.1, 1.8$  Hz, 1H), 1.70 – 1.59 (m, 1H), 1.53 (dq,  $J = 15.0, 1.8$  Hz, 1H), 1.52 – 1.40 (m, 1H), 1.31 (ddd,  $J = 13.1, 9.2, 4.5$  Hz, 1H).  $^{13}\text{C NMR}$  (126 MHz,  $\text{CDCl}_3$ )  $\delta$  172.36 (C=O), 135.92 (C), 128.94 (CH), 128.25 (CH), 127.79 (CH), 68.73 (CH), 64.03 ( $\text{CH}_2$ ), 54.66 (CH), 53.17 (CH), 53.09 (CH), 37.20 ( $\text{CH}_2$ ), 36.92 ( $\text{CH}_2$ ), 28.98 ( $\text{CH}_2$ ), 28.59 ( $\text{CH}_2$ ). **HRMS**; Calculated for  $\text{C}_{16}\text{H}_{22}\text{NO}_3$   $[\text{M}+\text{H}^+]=276.1597$ , observed = 276.1594. Data are consistent with literature <sup>1,2</sup>.

### Norscopolamine

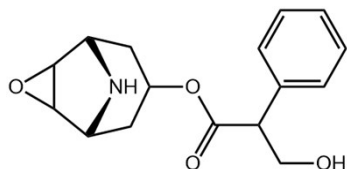

$^1\text{H NMR}$  (500 MHz,  $\text{CDCl}_3$ )  $\delta$  7.43 – 7.32 (m, 2H), 7.36 – 7.29 (m, 1H), 7.32 – 7.20 (m, 2H), 5.03 (t,  $J = 5.2$  Hz, 1H), 4.17 (dd,  $J = 11.0, 8.8$  Hz, 1H), 3.81 (dd,  $J = 11.0, 5.3$  Hz, 1H), 3.76 (dd,  $J = 8.8, 5.2$  Hz, 1H), 3.27 (d,  $J = 3.0$  Hz, 1H), 3.22 (dd,  $J = 3.9, 2.3$  Hz, 1H), 3.07 (dd,  $J = 3.9, 2.2$  Hz, 1H), 2.61 (br.s, 1H), 2.72 (s, 1H), 2.52 (d,  $J = 3.0$  Hz, 1H), 2.13 (ddd,  $J = 15.2, 5.4, 3.9$  Hz, 1H), 2.04 (ddd,  $J = 15.3, 5.2, 3.9$  Hz, 1H), 1.67 (dq,  $J = 15.3, 1.8$  Hz, 1H), 1.44 (dq,  $J = 15.5, 1.8$  Hz, 1H).  $^{13}\text{C NMR}$  (126 MHz,  $\text{CDCl}_3$ )  $\delta$  171.86 (C=O), 135.82 (C), 129.13 (CH), 128.17 (CH), 128.11 (CH), 66.94 (CH), 63.95 ( $\text{CH}_2\text{-OH}$ ), 54.40 (CH), 53.97 (CH), 53.47 (CH), 51.92 (CH), 51.80 (CH), 31.34 ( $\text{CH}_2$ ), 31.14 ( $\text{CH}_2$ ). **HRMS**: Calculated for  $\text{C}_{16}\text{H}_{20}\text{NO}_4$   $[\text{M}+\text{H}^+]=290.1387$ , observed = 290.1388. Data are consistent with literature <sup>1-3</sup>.

### N-formyl-noratropine

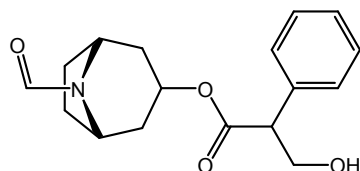

$^1\text{H NMR}$  (500 MHz,  $\text{CDCl}_3$ )  $\delta$  8.08 (s, 0.5H), 8.06 (s, 0.5H), 7.40 – 7.25 (m, 5H), 5.21 – 5.15 (m, 1H), 4.56 (dt,  $J = 6.8, 3.0$  Hz, 0.5H), 4.43 (dt,  $J = 6.8, 2.9$  Hz, 0.5H), 4.22 (ddd,  $J = 9.9, 7.9, 1.3$  Hz, 1H), 4.01 (dt,  $J = 6.7, 2.8$  Hz, 0.5H), 3.91 – 3.80 (m, 2.5H), 2.46 (broad s, 1H), 2.20 – 1.55 (m, 7H), 1.28 (m, 1H).  $^{13}\text{C NMR}$  (126 MHz,  $\text{CDCl}_3$ )  $\delta$  172.16 (OC=O), 172.14 (OC=O), 157.37 (CH=O), 135.41 (C), 135.33 (C), 129.06 (CH), 129.04 (CH), 128.11 (CH), 128.08 (CH), 128.00 (CH), 127.96 (CH), 68.23 (HC-O), 64.12 ( $\text{CH}_2\text{-OH}$ ), 64.08 ( $\text{CH}_2\text{-OH}$ ), 54.34 (CH), 54.31 (CH), 53.37 (CH), 53.27 (CH), 48.52 (CH), 48.44 (CH), 38.47 ( $\text{CH}_2$ ), 38.14 ( $\text{CH}_2$ ), 35.82 ( $\text{CH}_2$ ), 35.57 ( $\text{CH}_2$ ), 27.88 ( $\text{CH}_2$ ), 27.40 ( $\text{CH}_2$ ), 27.11 ( $\text{CH}_2$ ), 26.68 ( $\text{CH}_2$ ). **HRMS**: Calculated for  $\text{C}_{17}\text{H}_{22}\text{NO}_4$   $[\text{M}+\text{H}^+]=304.1543$ , observed = 304.1544. Data are consistent with literature <sup>2</sup>.



### Nortropacocaine

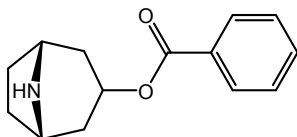

**<sup>1</sup>H NMR** (500 MHz, CD<sub>3</sub>OD) δ 8.05 – 7.94 (m, 2H), 7.59 (dd, J = 8.3, 6.5 Hz, 1H), 7.46 (t, J = 7.8 Hz, 2H), 5.29 (tt, J = 11.2, 6.1 Hz, 1H), 3.61 (p, J = 3.0 Hz, 2H), 2.10 (ddd, J = 13.6, 6.1, 2.9 Hz, 2H), 1.94 – 1.79 (m, 4H), 1.82 – 1.69 (m, 2H). **<sup>13</sup>C NMR** (126 MHz, CDCl<sub>3</sub>) δ 166.56 (C=O), 133.36 (C), 130.58 (CH), 129.53 (CH), 128.27 (CH), 67.50 (CH), 54.31 (CH), 38.98 (CH<sub>2</sub>), 29.15 (CH<sub>2</sub>). **HRMS:** Calculated for C<sub>14</sub>H<sub>18</sub>NO<sub>2</sub> [M+H<sup>+</sup>]=232.1332, observed = 232.1333. Data are consistent with literature <sup>4,5</sup>.

### Norhomatropine

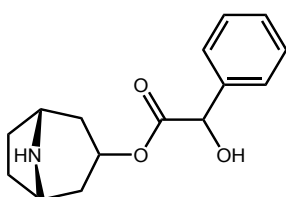

**<sup>1</sup>H NMR** (500 MHz, Chloroform-d) δ 7.47 – 7.27 (m, 5H), 5.14 – 5.00 (m, 2H), 3.45 – 3.38 (m, 1H), 3.32 (s, 1H), 3.29 – 3.24 (m, 1H), 2.12 – 1.95 (m, 1H), 1.94 – 1.86 (m, 1H), 1.85 – 1.71 (m, 2H), 1.64 (tq, J = 12.3, 6.4, 5.9 Hz, 1H), 1.49 – 1.35 (m, 2H), 1.14 – 0.95 (m, 1H). **<sup>13</sup>C NMR** (126 MHz, Chloroform-d) δ 172.91 (C=O), 138.54 (C), 128.62 (CH), 128.49 (CH), 126.72 (CH), 73.29 (CH), 70.12 (CH), 52.93 (CH), 52.83 (CH), 36.97 (CH<sub>2</sub>), 36.74 (CH<sub>2</sub>), 28.87 (CH<sub>2</sub>), 28.36 (CH<sub>2</sub>). **HRMS:** Calculated for C<sub>15</sub>H<sub>20</sub>NO<sub>3</sub> [M+H<sup>+</sup>] = 262.1438, observed = 262.1438.

### Norbenzatropine

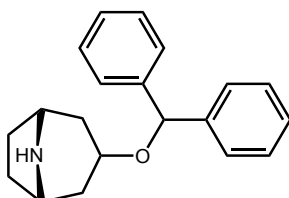

**<sup>1</sup>H NMR** (500 MHz, Chloroform-d) δ 7.37 – 7.22 (m, 10H), 5.42 (s, 1H), 4.75 (s, 3H), 4.06 – 4.01 (m, 2H), 3.84 – 3.75 (m, 1H), 2.50 – 2.36 (m, 4H), 2.26 – 2.17 (m, 2H), 2.06 (d, J = 15.3 Hz, 2H). **<sup>13</sup>C NMR** (126 MHz, Chloroform-d) δ 141.98 (C), 128.55 (CH), 127.65 (CH), 126.71 (CH), 81.60 (CH), 67.66 (CH), 53.99 (CH), 33.42 (CH<sub>2</sub>), 26.31 (CH<sub>2</sub>). **HRMS:** Calculated for C<sub>20</sub>H<sub>24</sub>NO [M+H<sup>+</sup>] = 294.1852, observed = 294.1852.

### 8-((8-azabicyclo[3.2.1]octan-8-yl)methylene)-8-azabicyclo[3.2.1]octan-8-ium

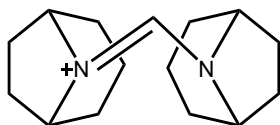

**<sup>1</sup>H NMR** (500 MHz, Chloroform-d)  $\delta$  8.18 (s, 1H), 4.52 – 4.37 (m, 4H), 2.29 – 2.17 (m, J = 5.6, 4.7 Hz, 4H), 2.04 – 1.92 (m, 4H), 1.91 – 1.72 (m, 11H). **<sup>13</sup>C NMR** (126 MHz, Chloroform-d)  $\delta$  143.22 (CH), 63.85 (CH), 56.54 (CH), 33.21 (CH<sub>2</sub>), 32.09 (CH<sub>2</sub>), 28.35 (CH<sub>2</sub>), 25.68 (CH<sub>2</sub>), 16.22 (CH<sub>2</sub>). **HRMS:** Calculated for C<sub>15</sub>H<sub>25</sub>N<sub>2</sub><sup>+</sup> [M] = 233.2012, observed = 233.2012.

### 8-(cyanomethyl)-8-azabicyclo[3.2.1]octan-3-yl 3-hydroxy-2-phenylpropanoate

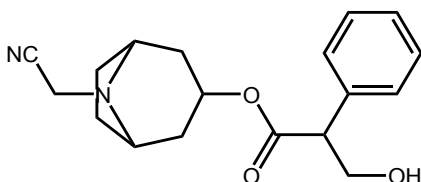

**<sup>1</sup>H NMR** (500 MHz, Chloroform-d)  $\delta$  7.37 – 7.23 (m, 5H), 5.05 (t, J = 5.3 Hz, 1H), 4.18 (dd, J = 11.0, 8.6 Hz, 1H), 3.86 – 3.76 (m, 2H), 3.27 (d, J = 13.7 Hz, 3H), 3.19 – 3.12 (m, 1H), 2.44 – 2.24 (br.s, 1H), 2.21 – 2.05 (m, 2H), 1.87 – 1.74 (m, 3H), 1.66 – 1.51 (m, 2H), 1.26 – 1.20 (m, 1H). **<sup>13</sup>C NMR** (126 MHz, Chloroform-d)  $\delta$  172.20 (CO), 135.46 (C), 129.01 (CH), 128.14 (CH), 127.90 (CH), 116.95 (CN), 67.54 (CH), 64.15 (CH<sub>2</sub>-OH), 58.95 (CH), 58.86 (CH), 54.28 (CH), 40.81 (CH<sub>2</sub>), 36.65 (CH), 36.45 (CH), 25.25 (CH), 24.70 (CH). **HRMS:** Calculated for C<sub>18</sub>H<sub>23</sub>N<sub>2</sub>O<sub>3</sub> [M+H<sup>+</sup>] = 315.1703, observed = 315.1703. Data are consistent with literature <sup>6,7</sup>.

### Norcocaine

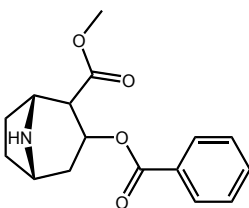

**<sup>1</sup>H NMR** (500 MHz, Chloroform-d)  $\delta$  7.96 – 7.91 (m, 2H), 7.55 (td, J = 7.3, 1.4 Hz, 1H), 7.45 – 7.38 (m, 2H), 5.44 (dt, J = 11.6, 6.5 Hz, 1H), 3.82 (td, J = 7.6, 2.6 Hz, 2H), 3.64 (s, 3H), 3.47 (s, 1H), 3.11 (dd, J = 6.8, 2.2 Hz, 1H), 2.20 – 1.95 (m, 4H), 1.80 – 1.70 (m, 2H). **<sup>13</sup>C NMR** (126 MHz, Chloroform-d)  $\delta$  172.83 (C=O), 165.64 (C=O), 133.32 (CH), 129.94 (C), 129.64 (CH), 128.52 (CH), 66.75 (CH), 56.07 (CH), 53.40 (CH), 51.96 (CH<sub>3</sub>), 48.02 (CH), 34.82 (CH<sub>2</sub>), 28.10 (CH<sub>2</sub>), 27.20 (CH<sub>2</sub>). **HRMS:** Calculated for C<sub>16</sub>H<sub>20</sub>NO<sub>4</sub> [M+H<sup>+</sup>] = 290.1386, observed = 290.1386.

### 4-(benzhydryloxy)piperidine

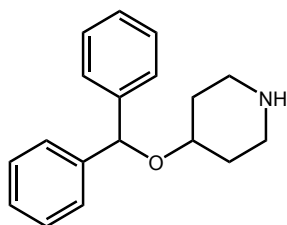

**<sup>1</sup>H NMR** (500 MHz, Chloroform-d) 7.32 (d,  $J = 5.5$  Hz, 8H), 7.26 – 7.23 (m, 2H), 5.44 (s, 1H), 3.81 – 3.67 (m, 2H), 3.45 (ddd,  $J = 14.0, 10.5, 3.9$  Hz, 2H), 3.27 (dt,  $J = 12.7, 4.6$  Hz, 2H), 1.99 (qt,  $J = 14.8, 4.0$  Hz, 4H). **<sup>13</sup>C NMR** (126 MHz, Chloroform-d)  $\delta$  142.01 (C), 128.72 (CH), 127.92 (CH), 127.01 (CH), 81.52 (CH), 67.49 (CH), 41.68 (CH<sub>2</sub>), 27.59 (CH<sub>2</sub>). **HRMS:** Calculated for C<sub>18</sub>H<sub>22</sub>NO [M+H<sup>+</sup>]=268.1696, observed = 268.1696 .

**(R)-2-(2-((R)-1-(4-chlorophenyl)-1-phenylethoxy)ethyl)pyrrolidine formate**

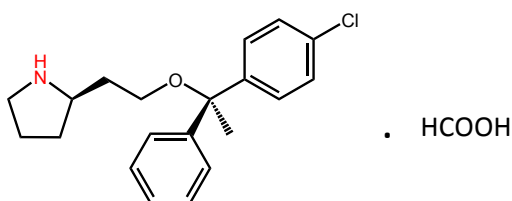

**<sup>1</sup>H NMR** (500 MHz, Chloroform-d) 8.58 (s, 1H), 7.35 – 7.23 (m, 10H), 3.66 (tt,  $J = 8.9, 6.5$  Hz, 1H), 3.43 – 3.17 (m, 4H), 2.25 – 1.87 (m, 6H), 1.86 (d,  $J = 4.4$  Hz, 3H), 1.68 (dq,  $J = 12.8, 8.8$  Hz, 1H). **<sup>13</sup>C NMR** (126 MHz, Chloroform-d)  $\delta$  169.07 (C=O), 145.84 (C), 145.10 (C), 132.95 (CCl), 128.32 (CH), 128.30 (CH), 128.27 (CH), 127.34 (CH), 126.72 (CH), 80.70 (C), 59.76 (CH<sub>2</sub>), 57.78 (CH), 44.15 (CH<sub>2</sub>), 32.72 (CH<sub>2</sub>), 30.56 (CH<sub>2</sub>), 25.63 (CH<sub>3</sub>), 23.84 (CH<sub>2</sub>). **HRMS:** Calculated for C<sub>20</sub>H<sub>25</sub>NOCl[M+H<sup>+</sup>] = 330.1619, observed = 330.1616 .

**(5R)-5-(2-((R)-1-(4-chlorophenyl)-1-phenylethoxy)ethyl)-1-methylpyrrolidin-2-ol**

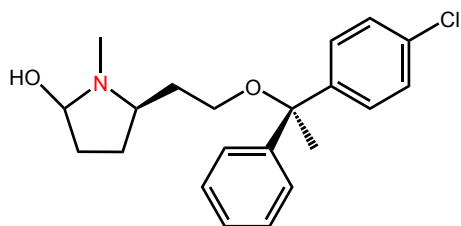

**<sup>1</sup>H NMR** (500 MHz, Chloroform-d)  $\delta$  7.36 – 7.24 (m, 9H), 3.99 (ddd,  $J = 11.4, 8.4, 2.6$  Hz, 1H), 3.81 (dq,  $J = 14.2, 8.8, 8.1$  Hz, 2H), 3.45 (s, 3H), 3.39 (dq,  $J = 8.3, 4.2, 3.1$  Hz, 1H), 3.29 (td,  $J = 9.0, 4.0$  Hz, 1H), 2.33 – 2.09 (m, 4H), 2.02 – 1.88 (m, 2H), 1.85 (s, 3H). **<sup>13</sup>C NMR** (126 MHz, Chloroform-d)  $\delta$  145.15 (C), 145.01 (C), 132.85 (CCl), 128.30 (CH), 128.26 (CH), 128.09 (CH), 127.41 (CH), 126.71 (CH), 80.80 (CH), 76.39 (C), 69.18 (CH), 58.77 (CH<sub>2</sub>), 51.82 (CH<sub>3</sub>), 28.24 (CH<sub>2</sub>), 27.76 (CH<sub>2</sub>), 25.49 (CH<sub>2</sub>), 19.56 (CH<sub>3</sub>). **HRMS:** Calculated for C<sub>21</sub>H<sub>27</sub>ClNO<sub>2</sub> [M+H<sup>+</sup>] = 360.1725, observed = 360.1720.

# $^1\text{H}$ and $^{13}\text{C}$ NMR spectra

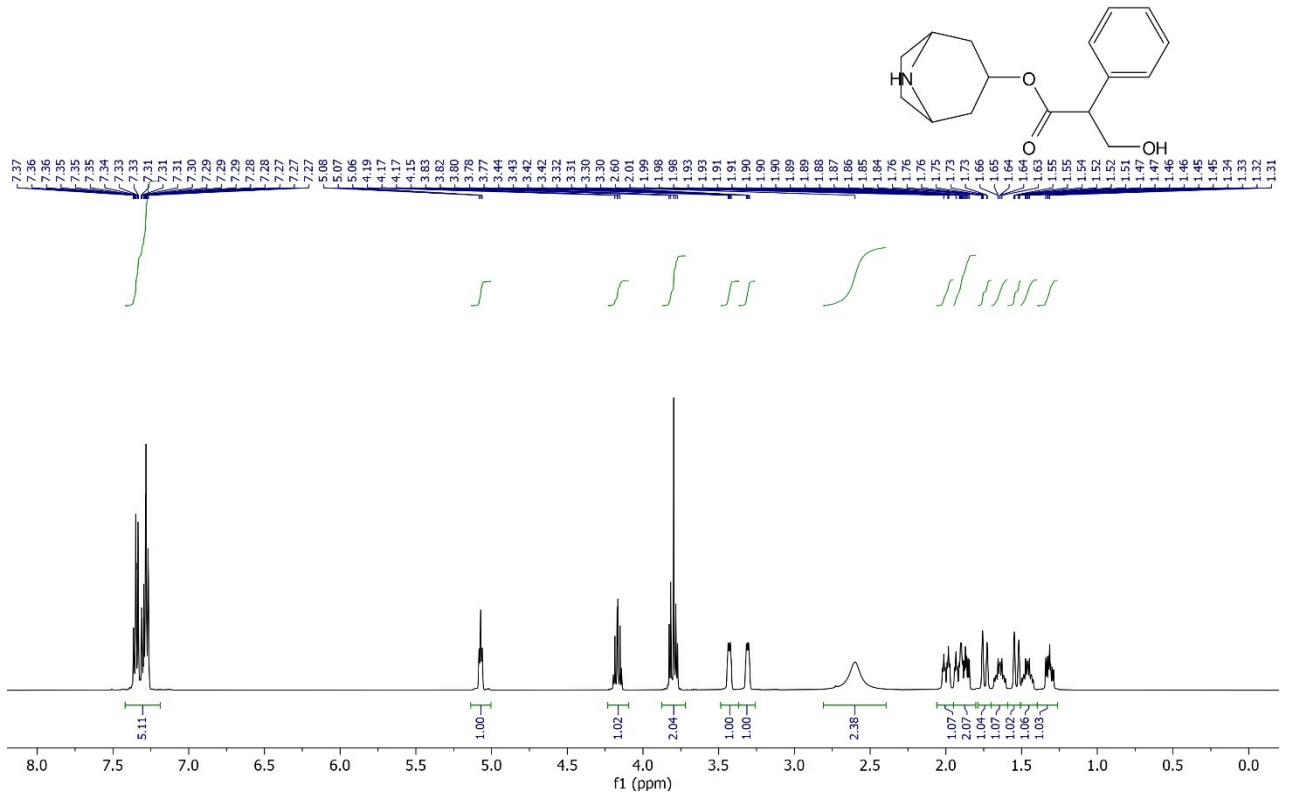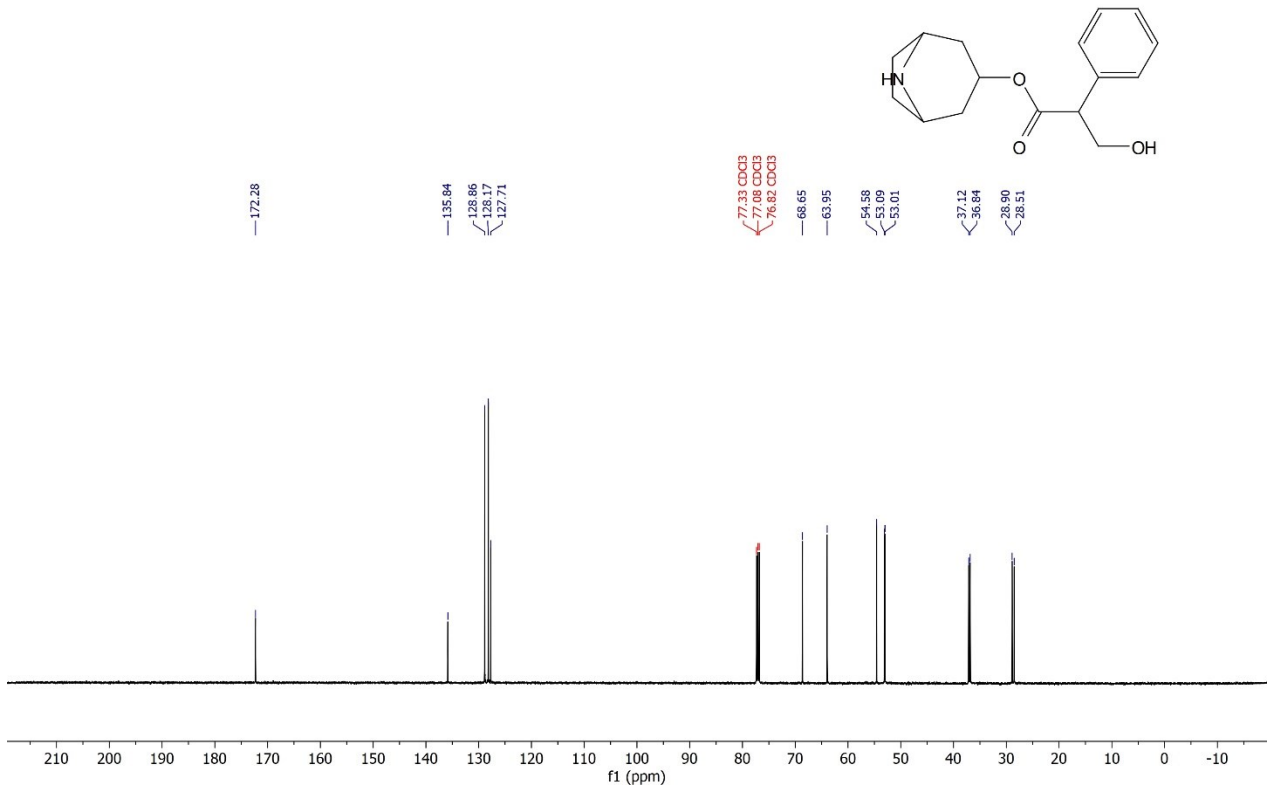

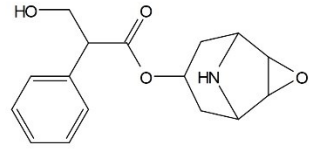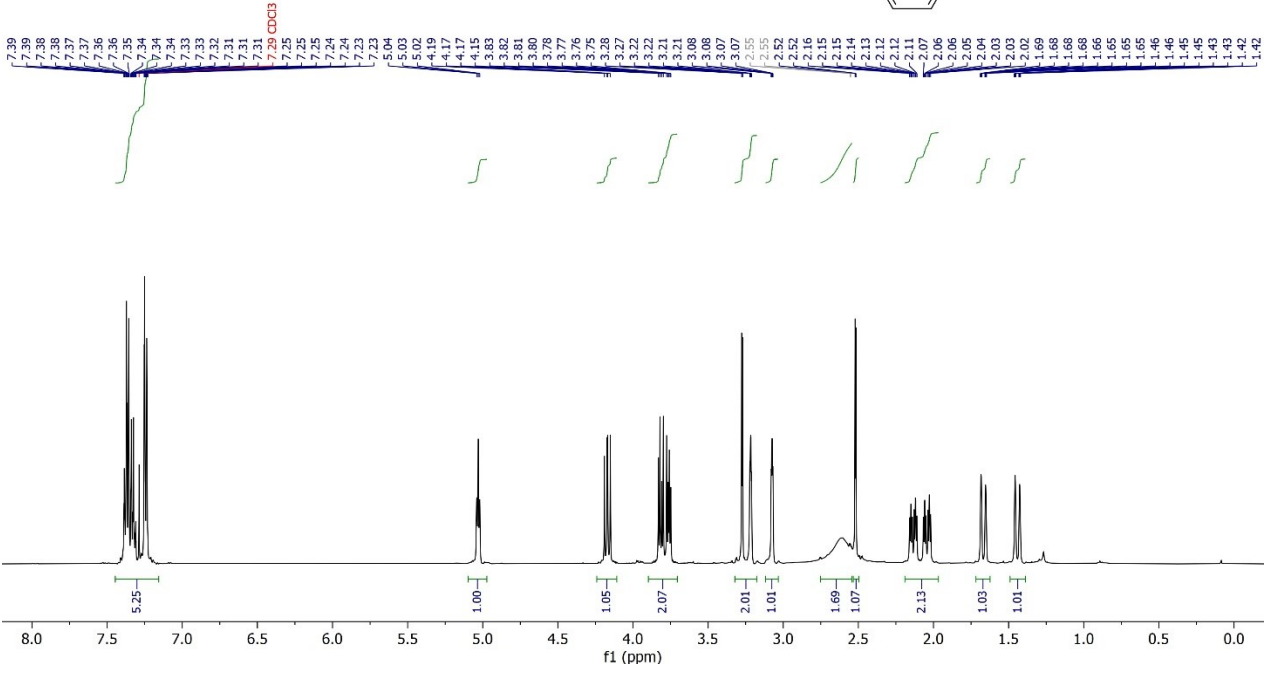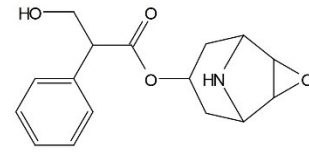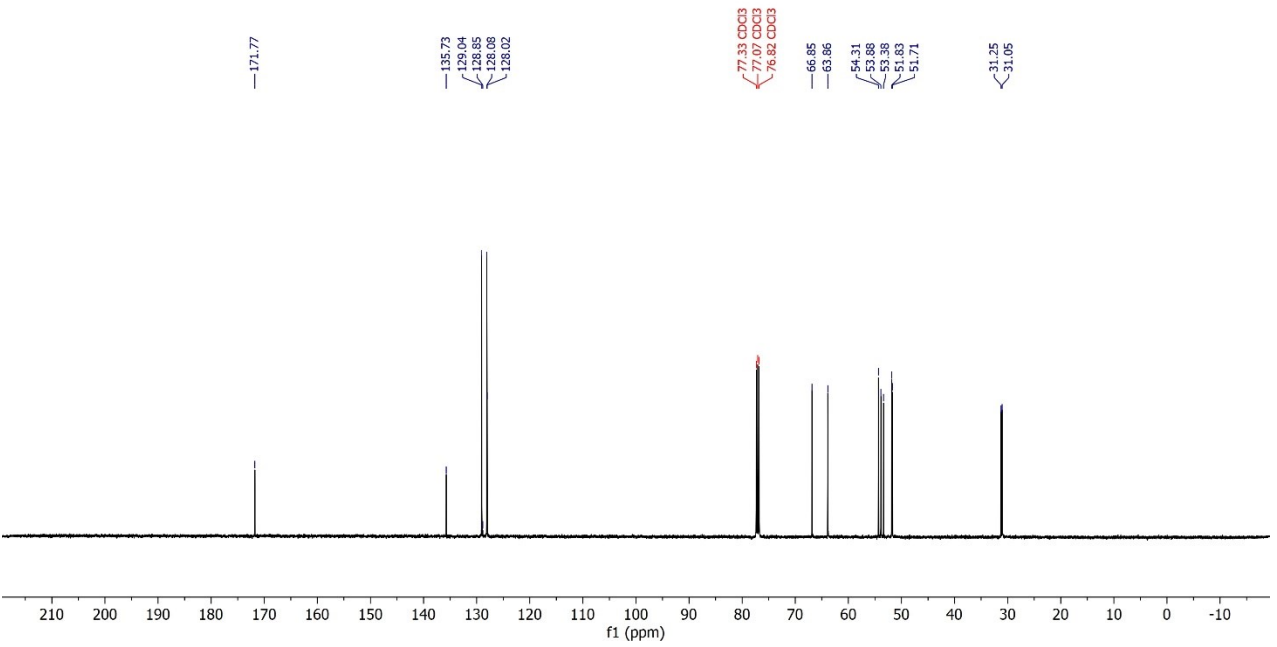

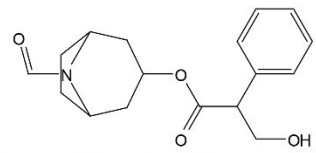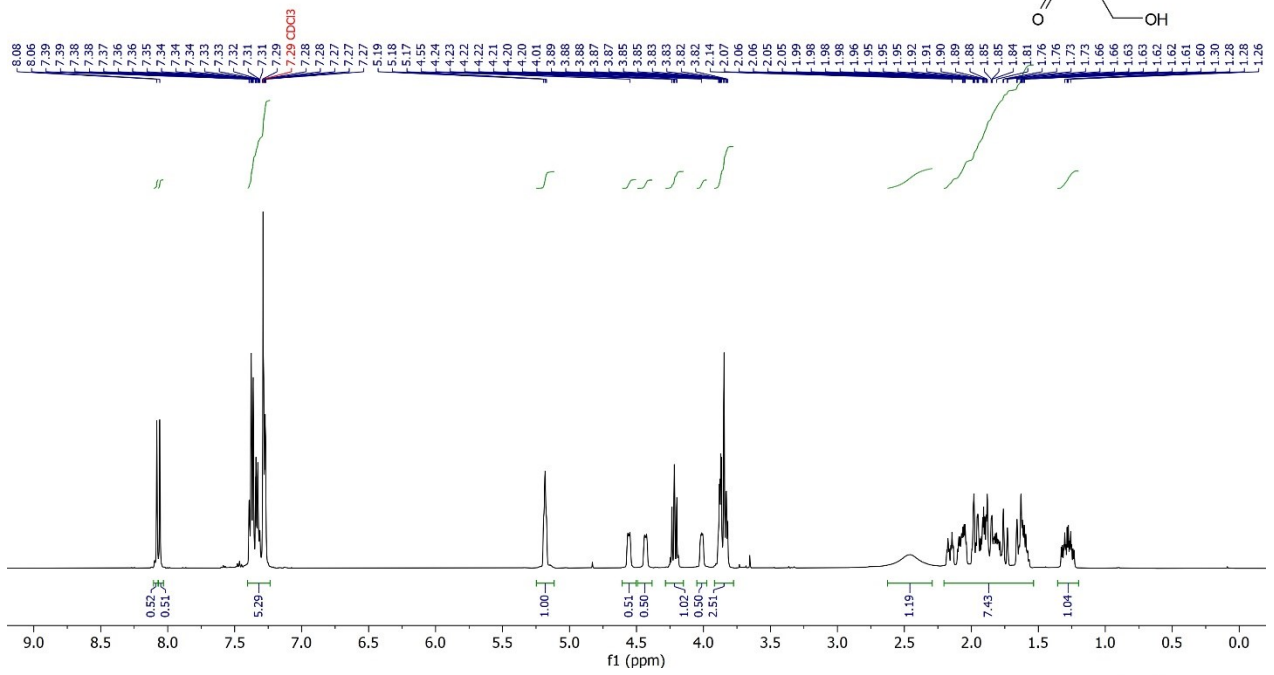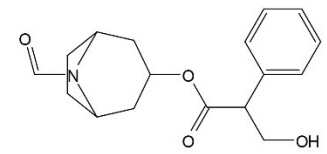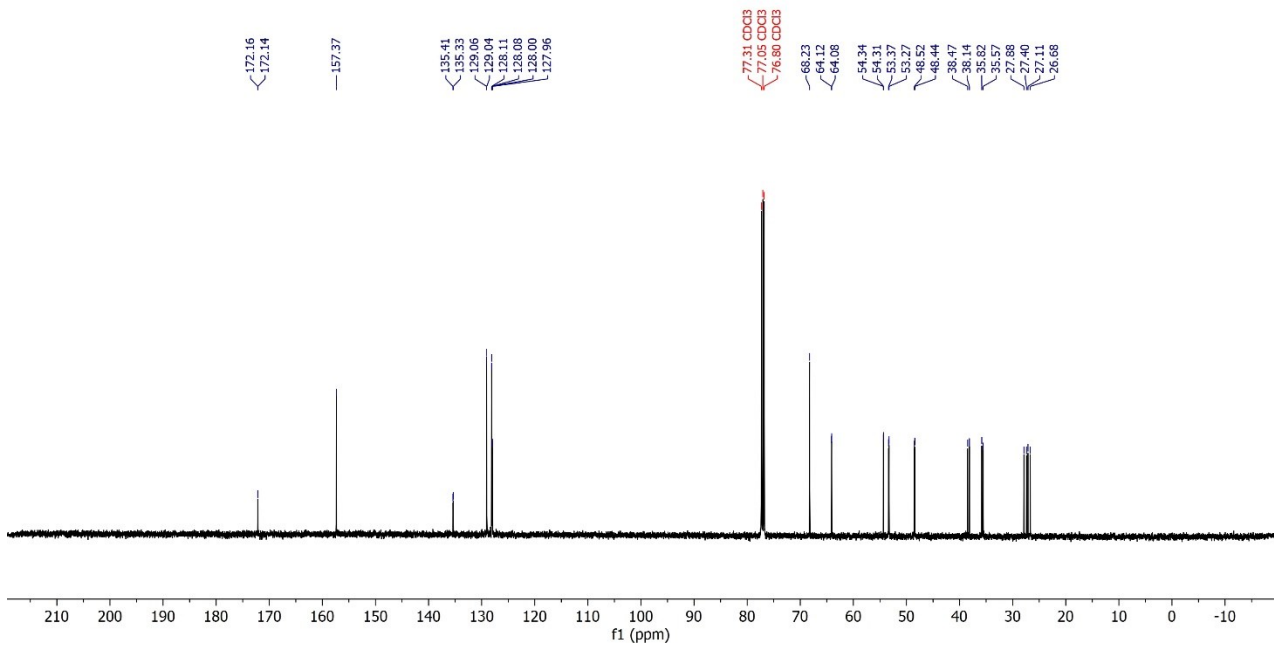

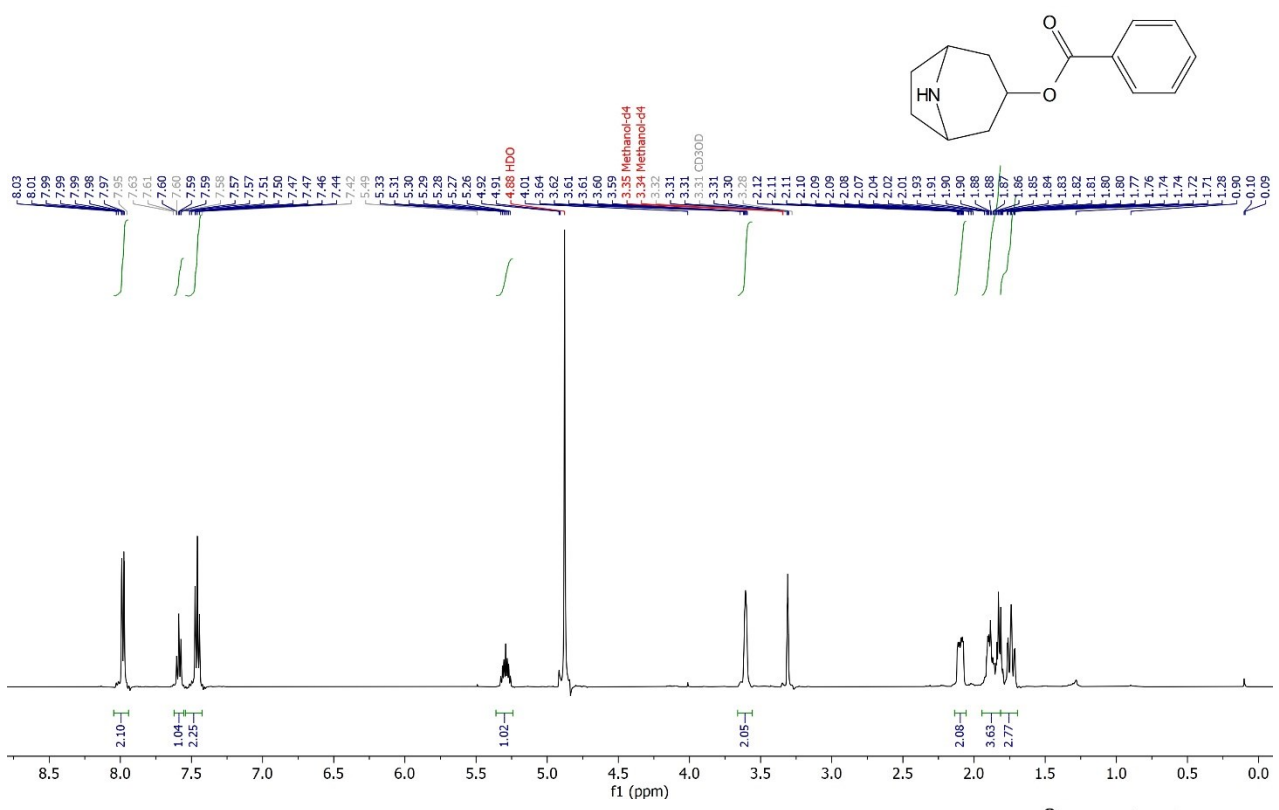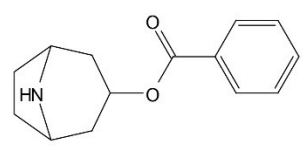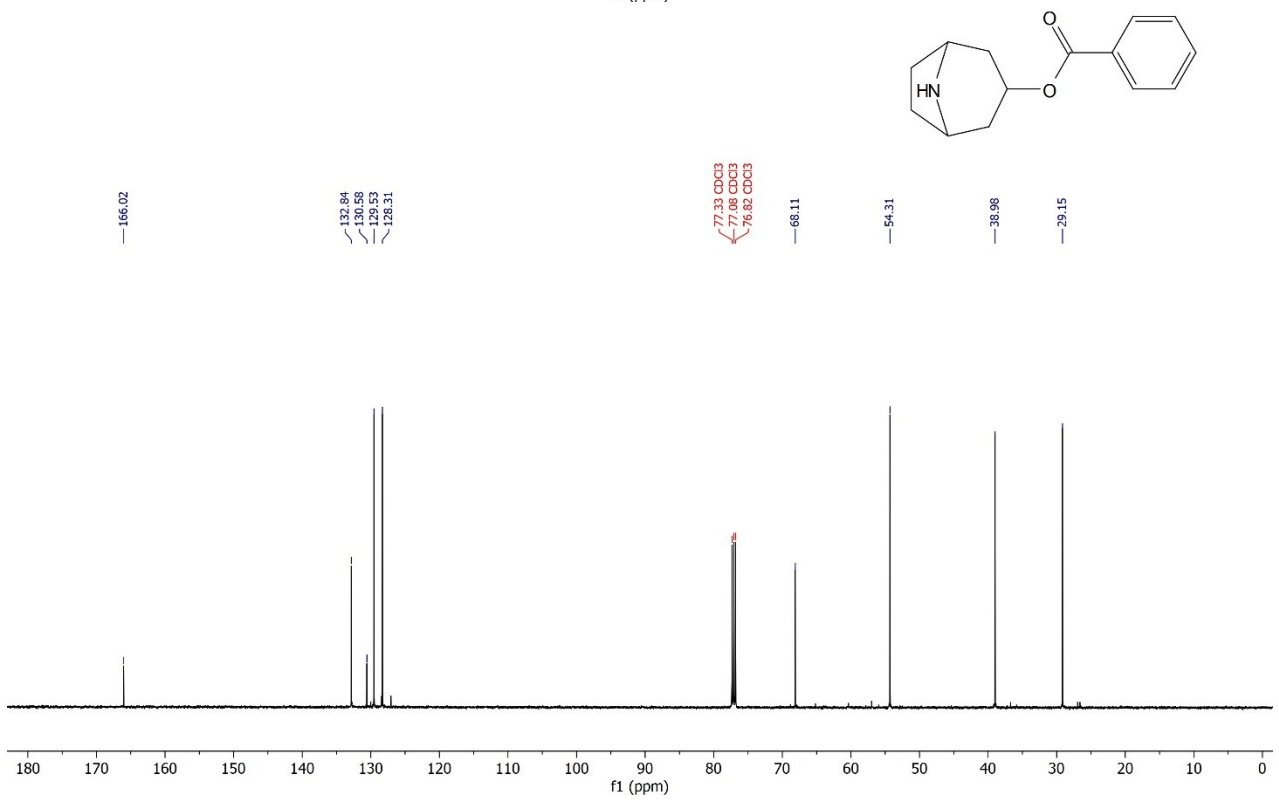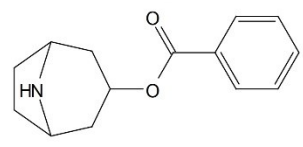

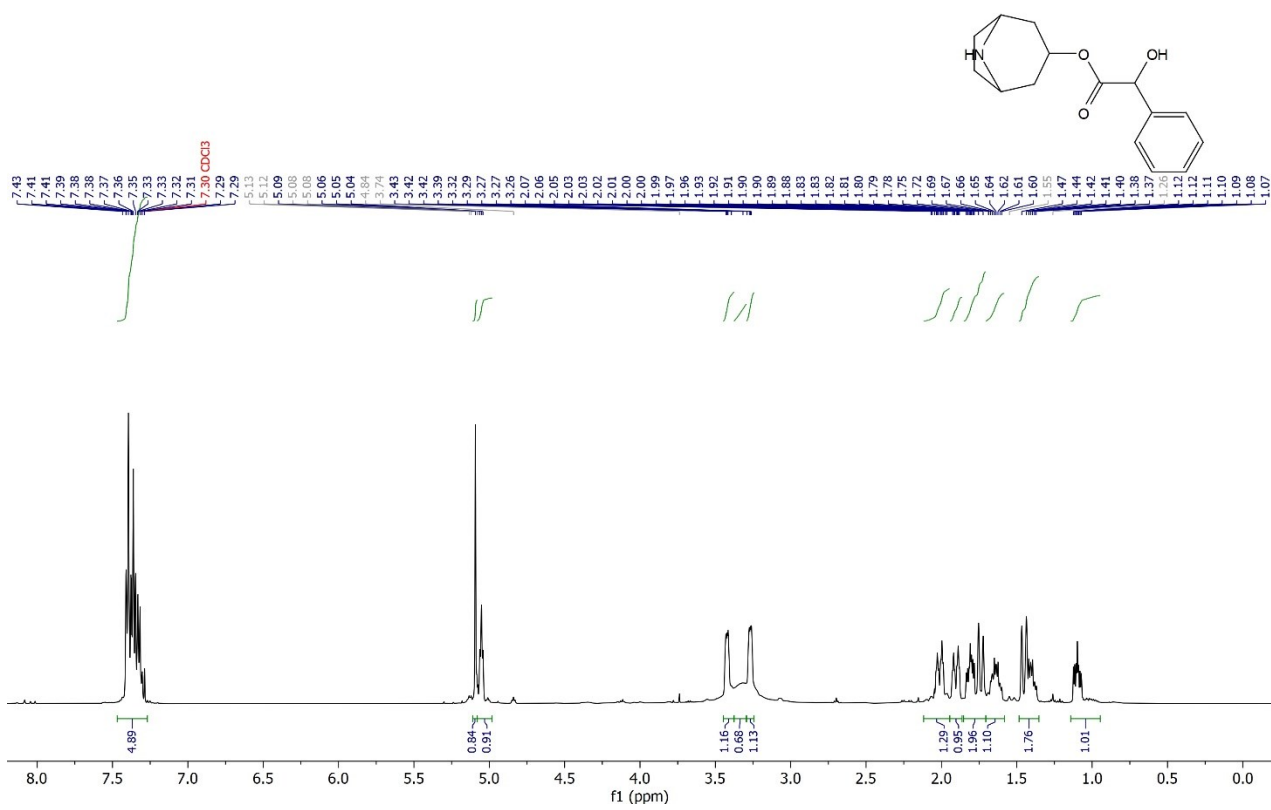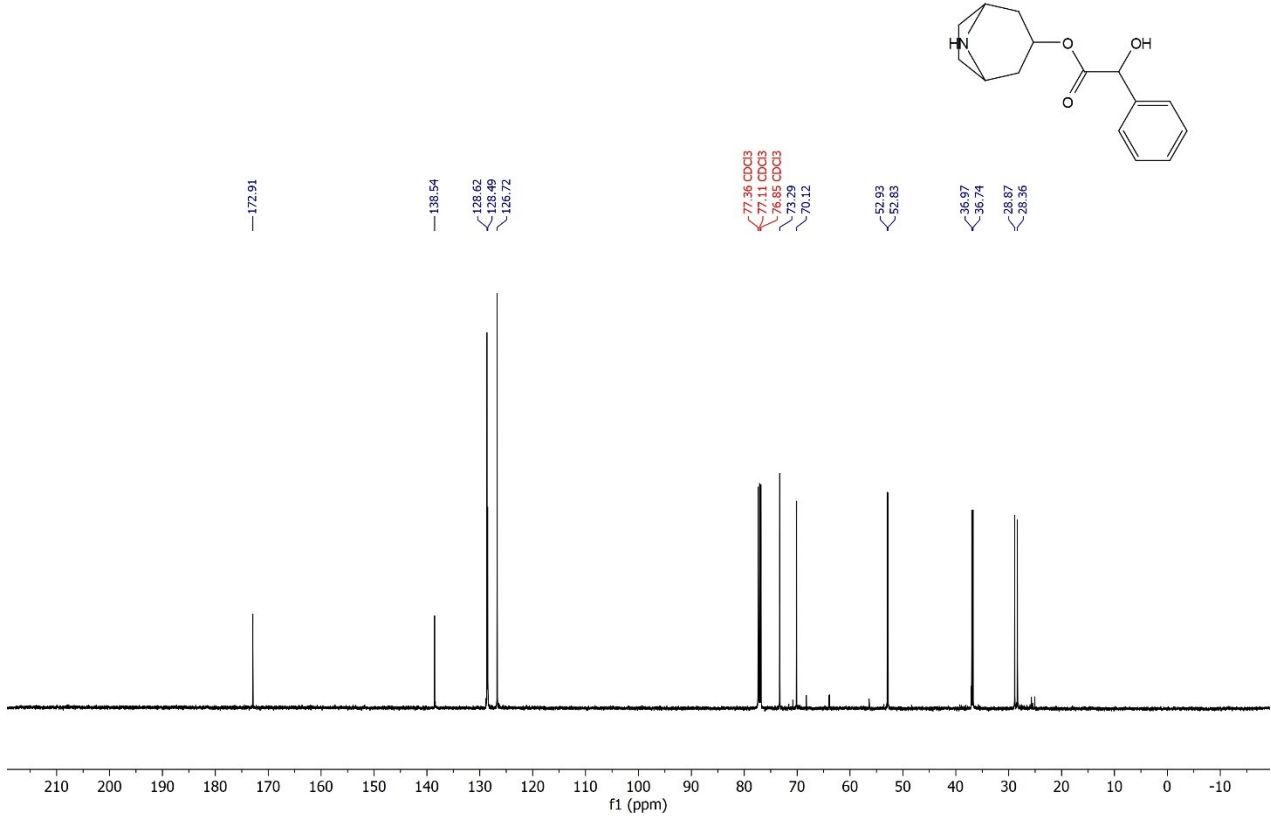



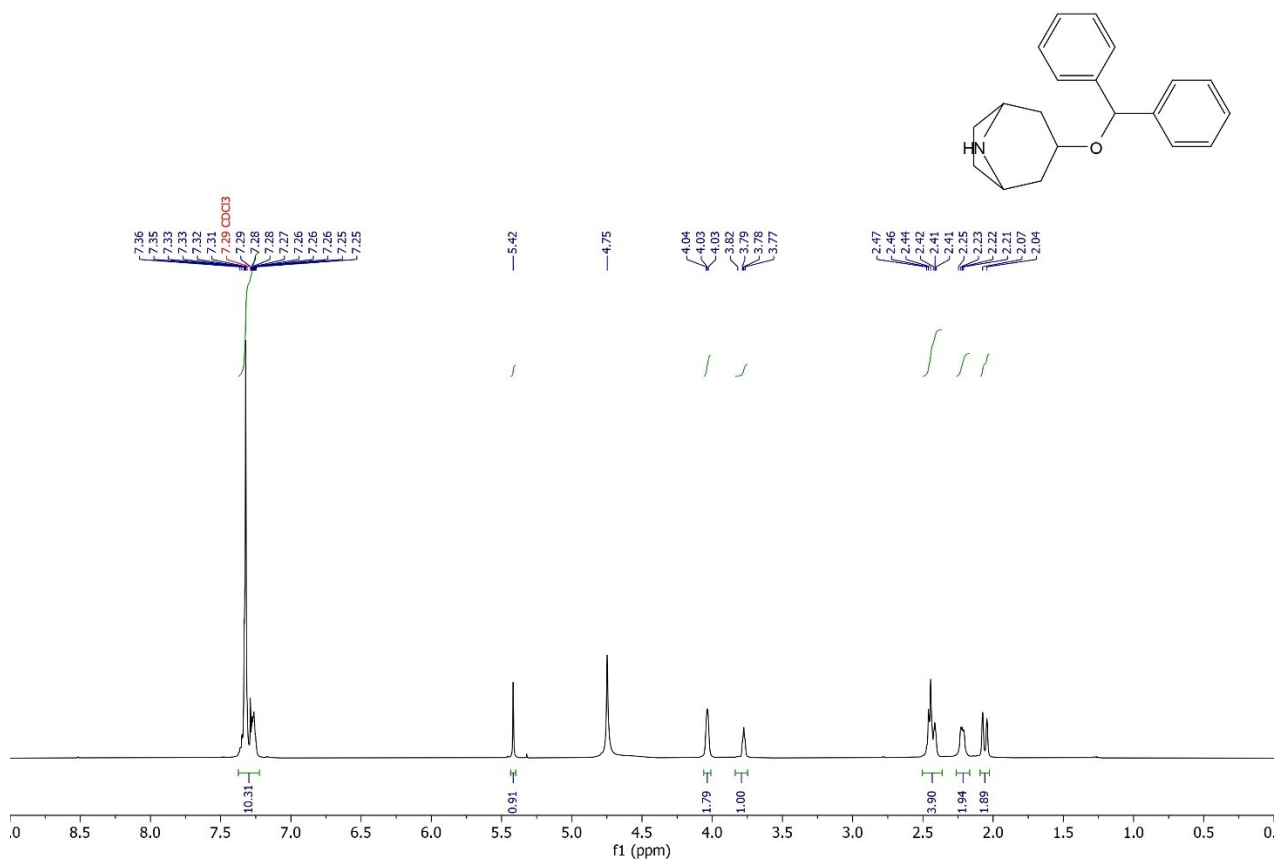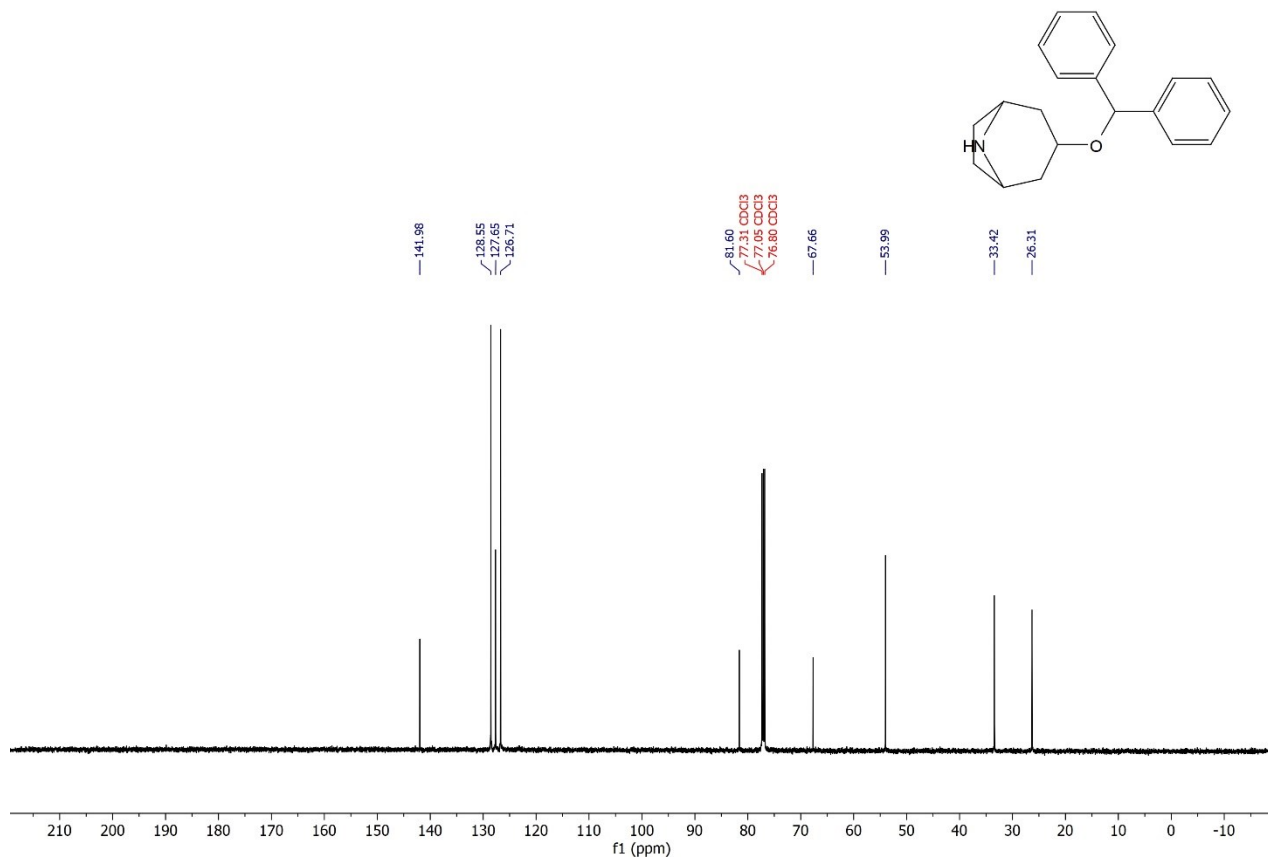

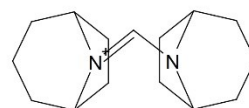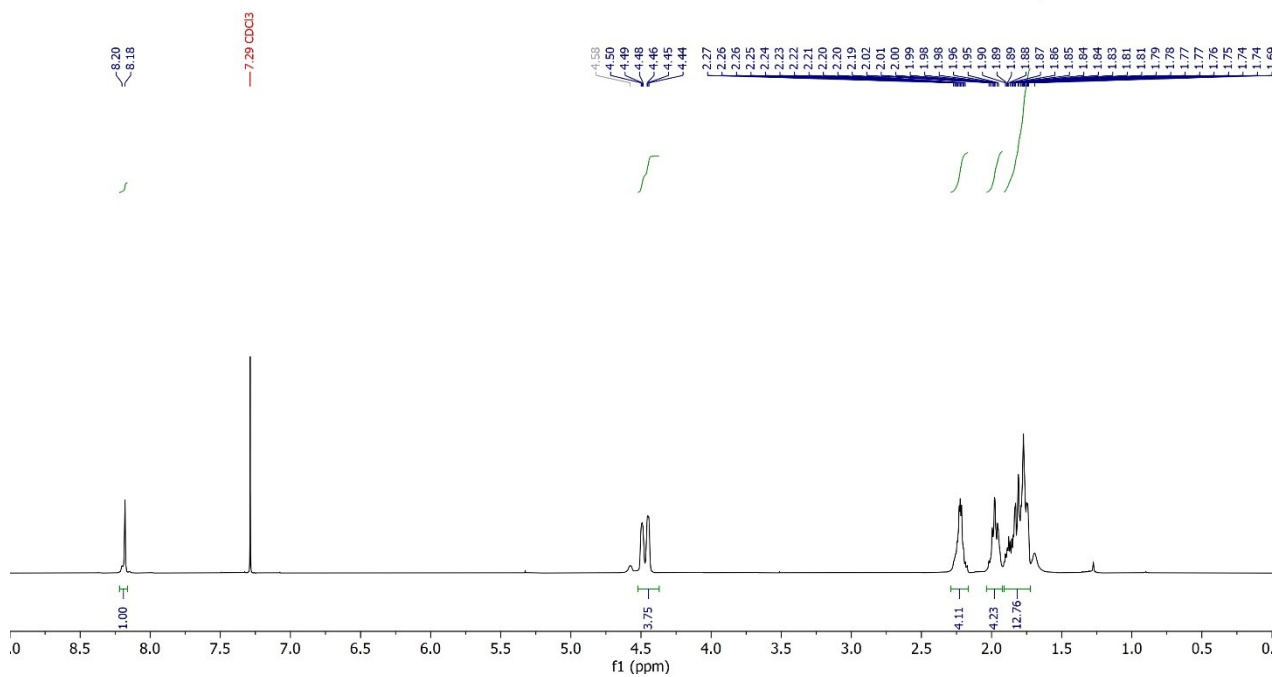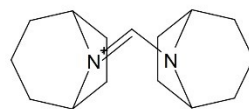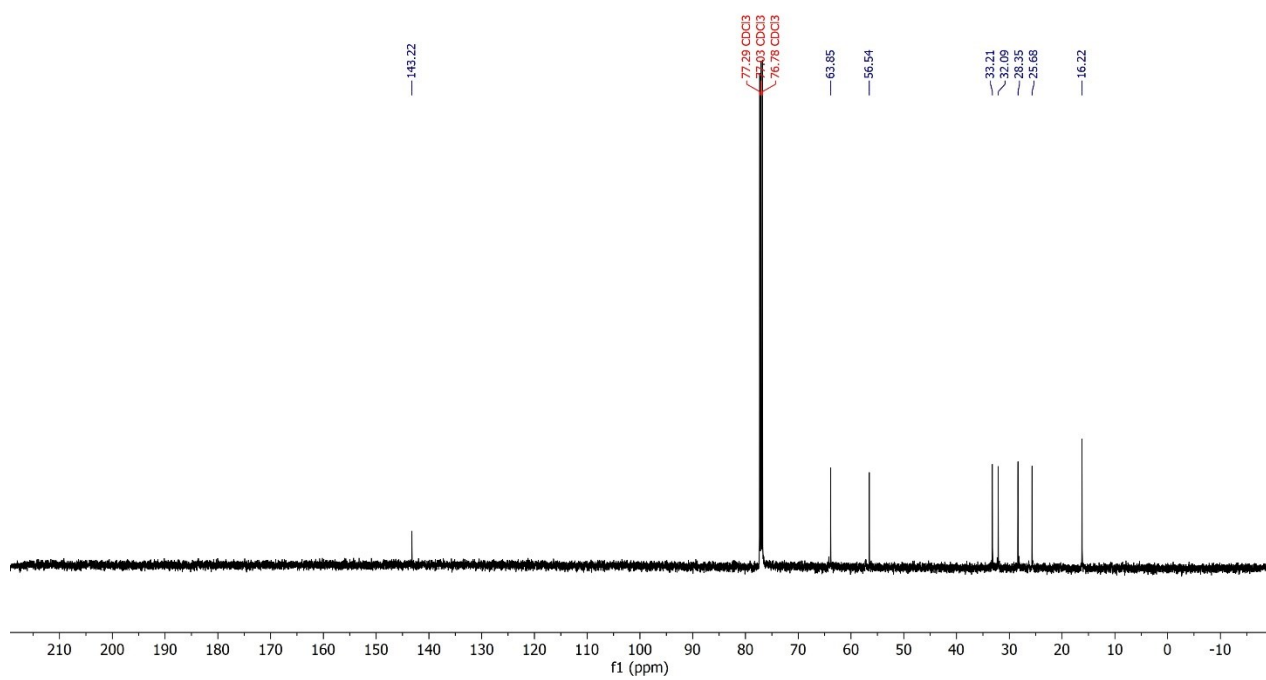

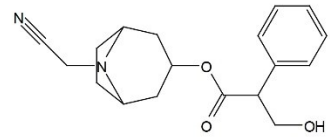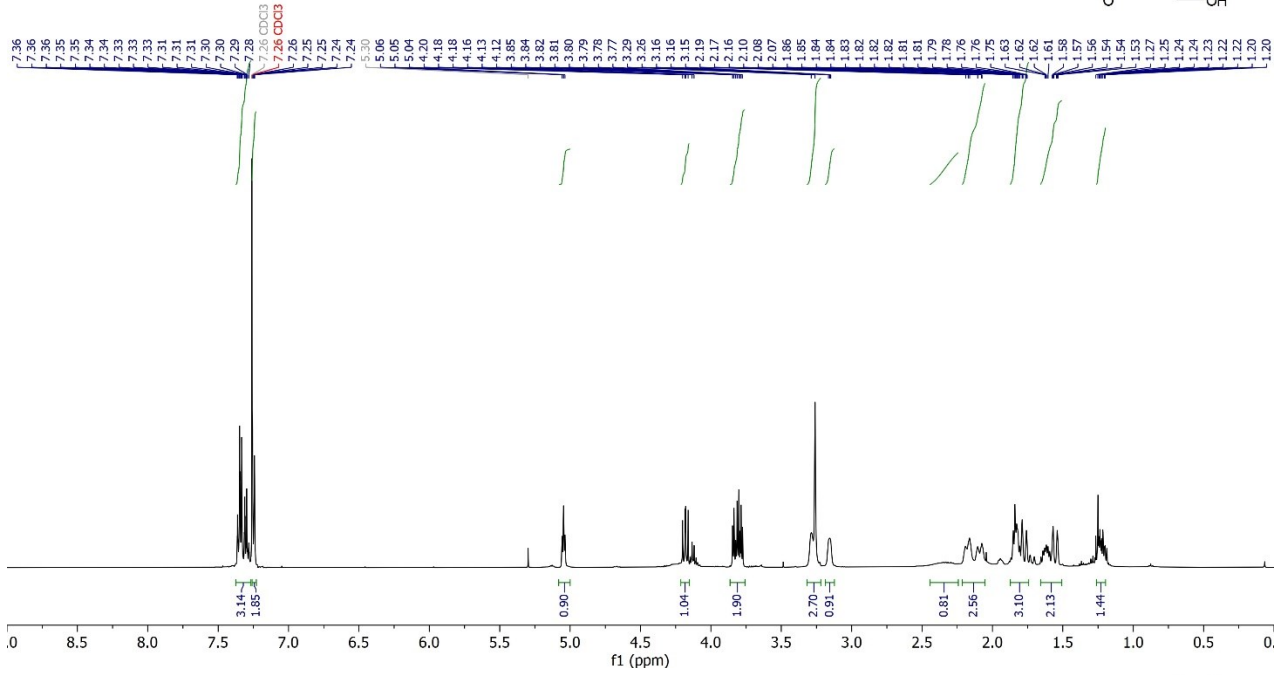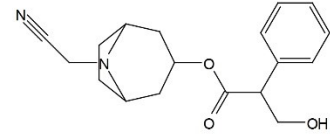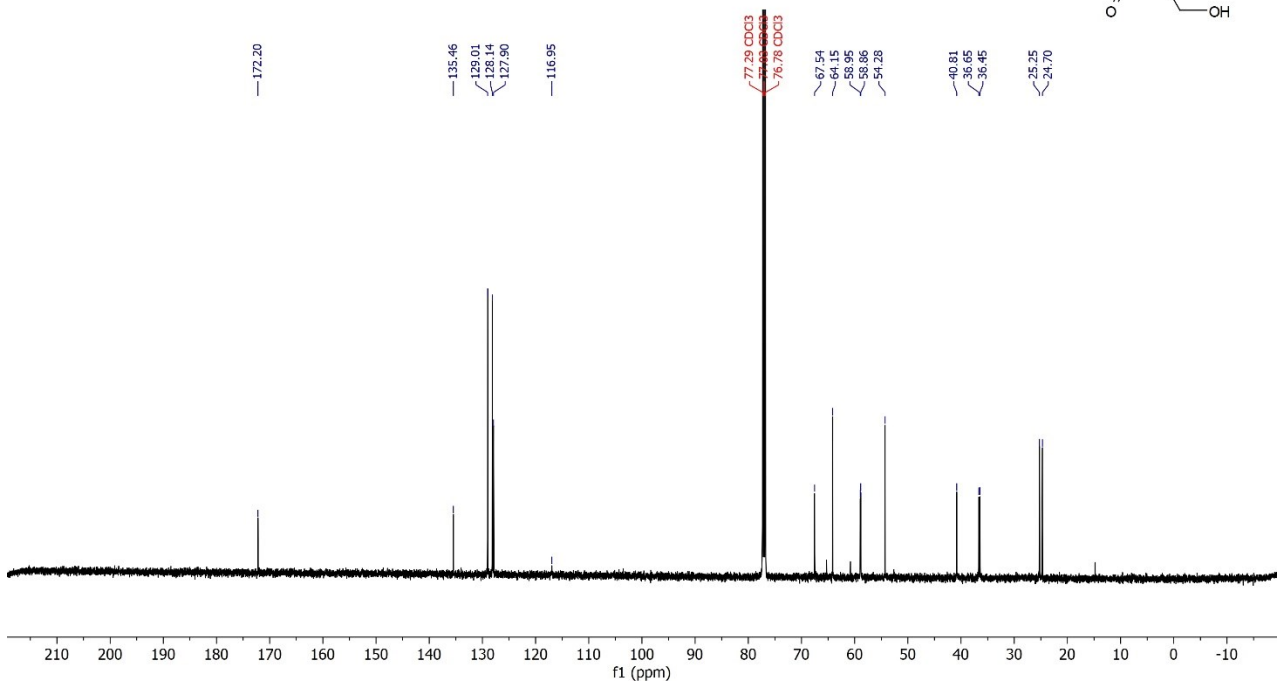

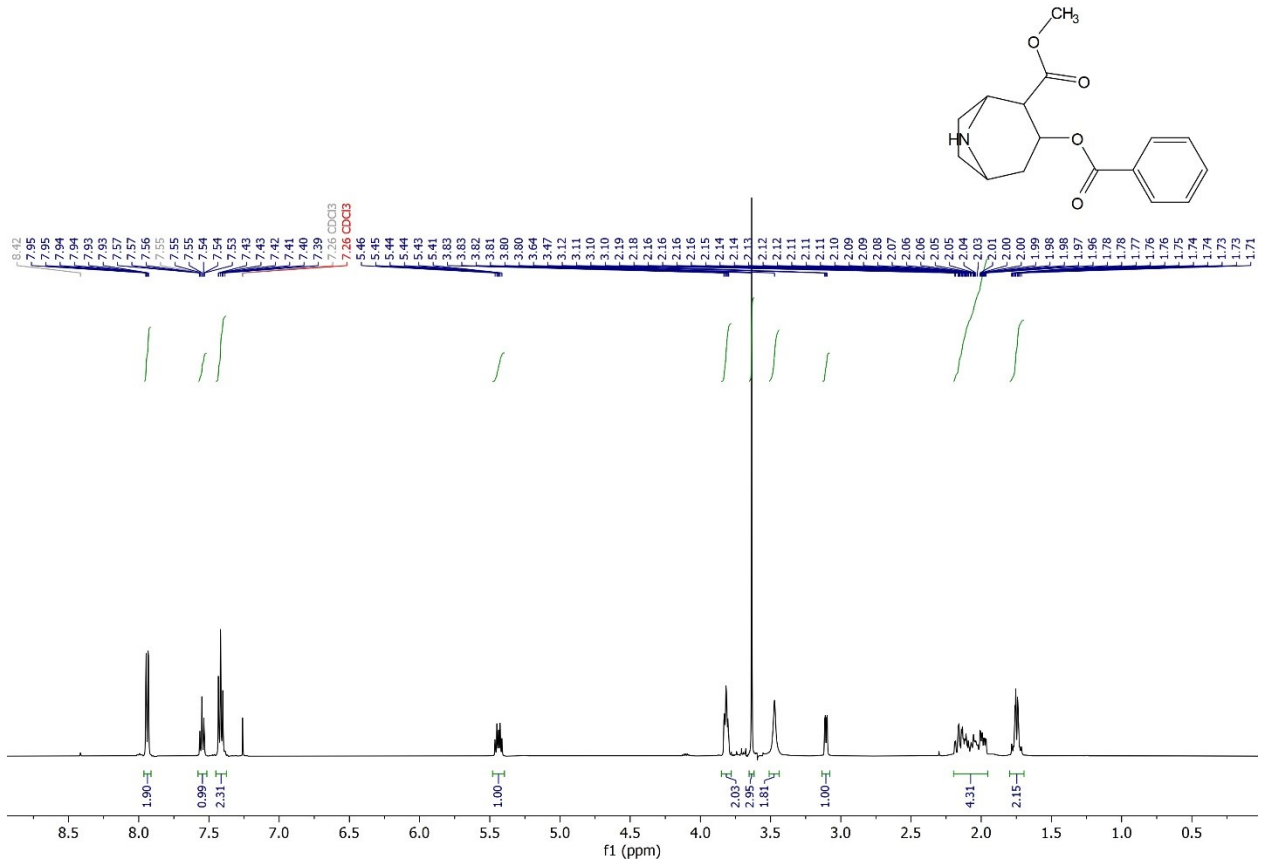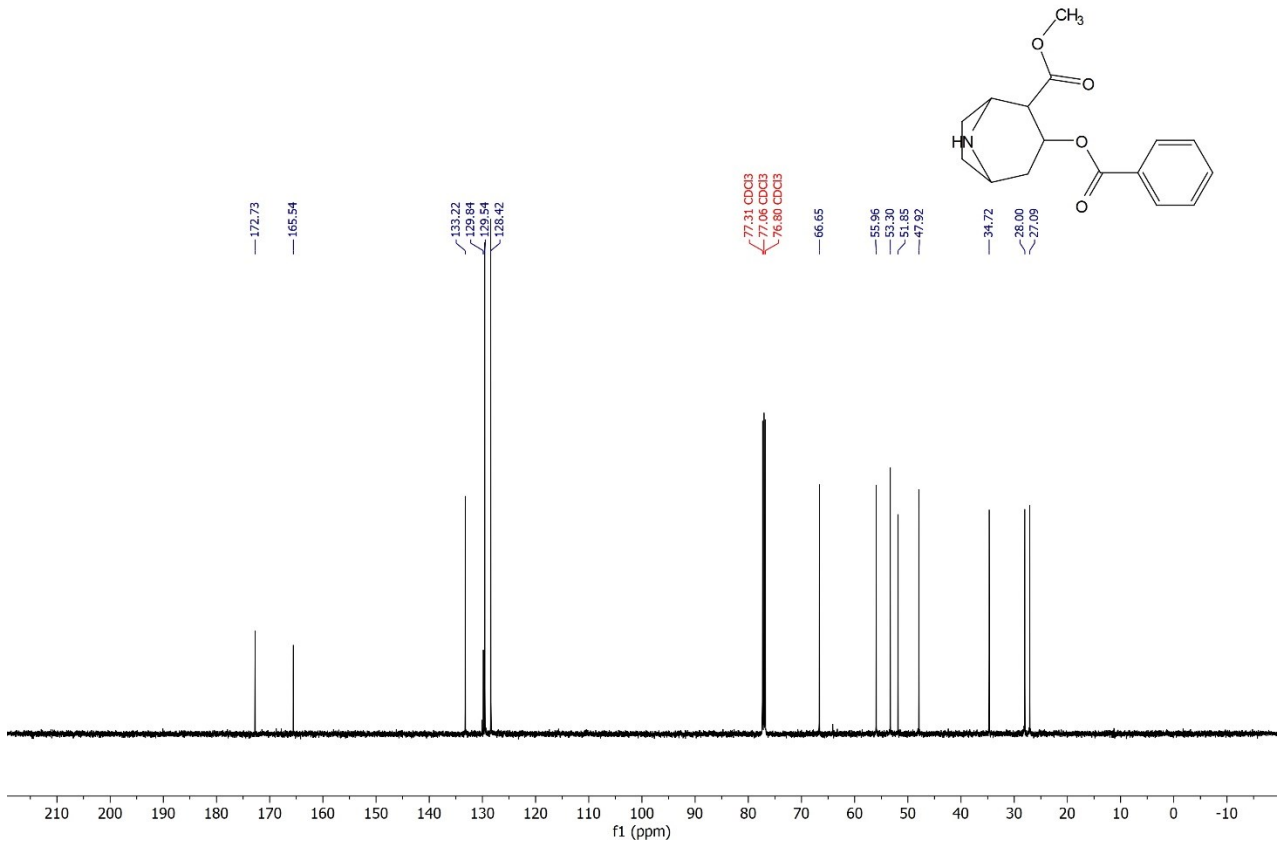

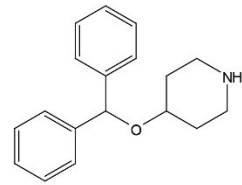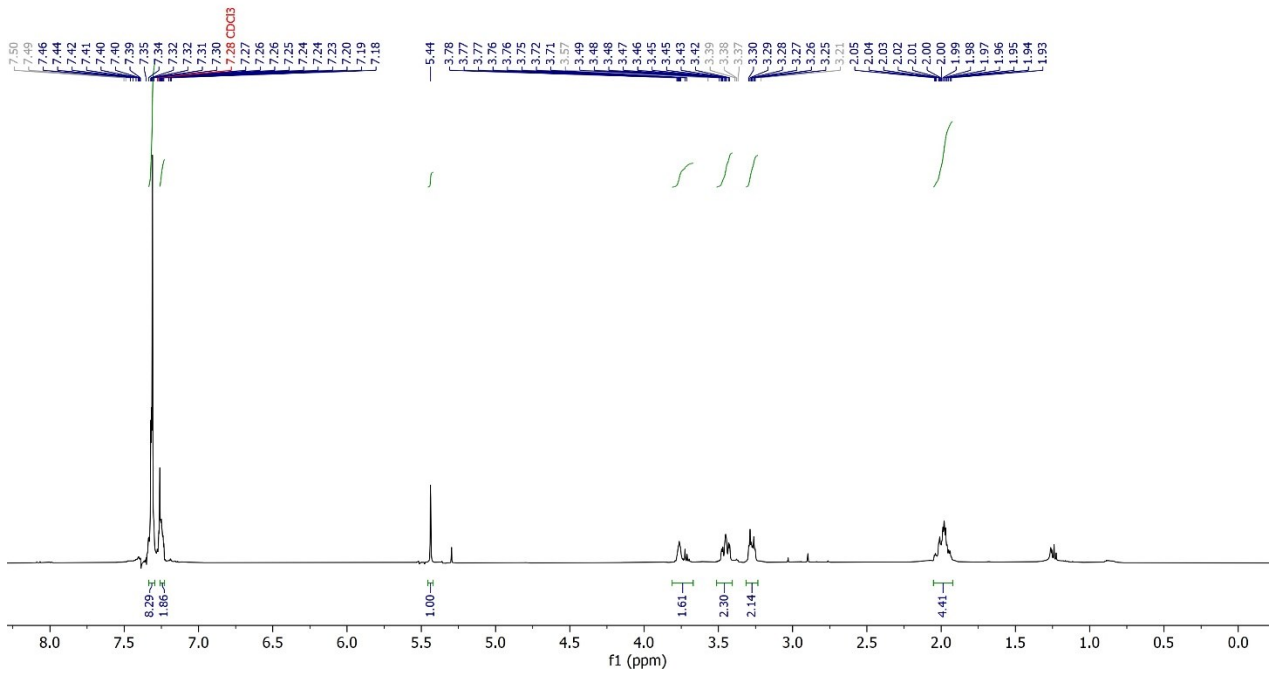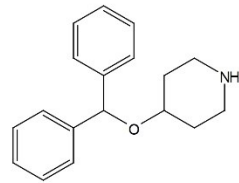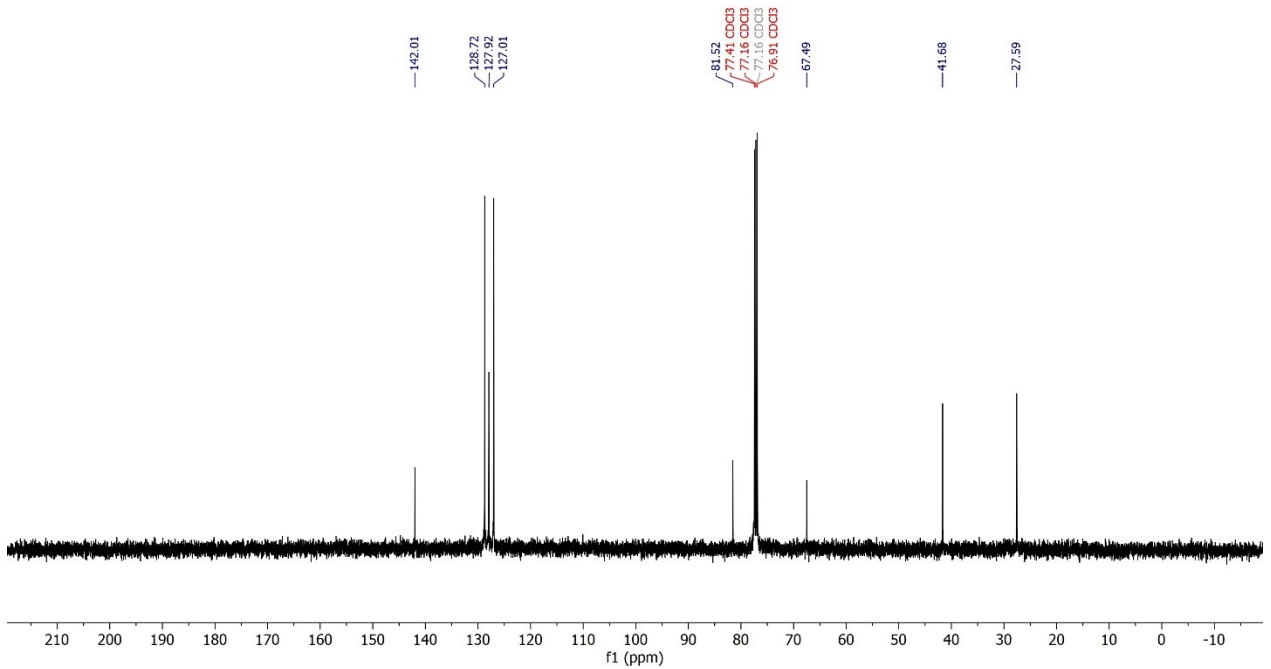

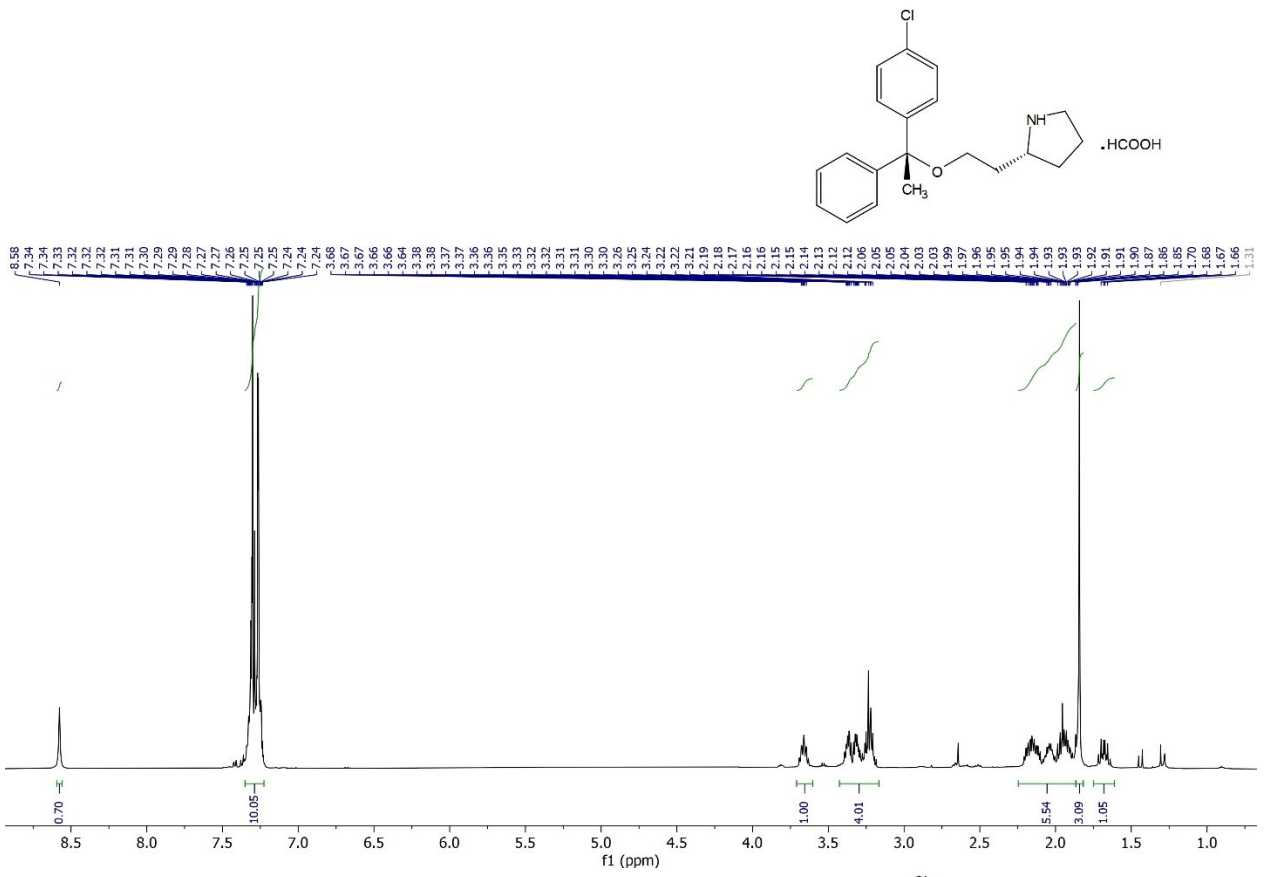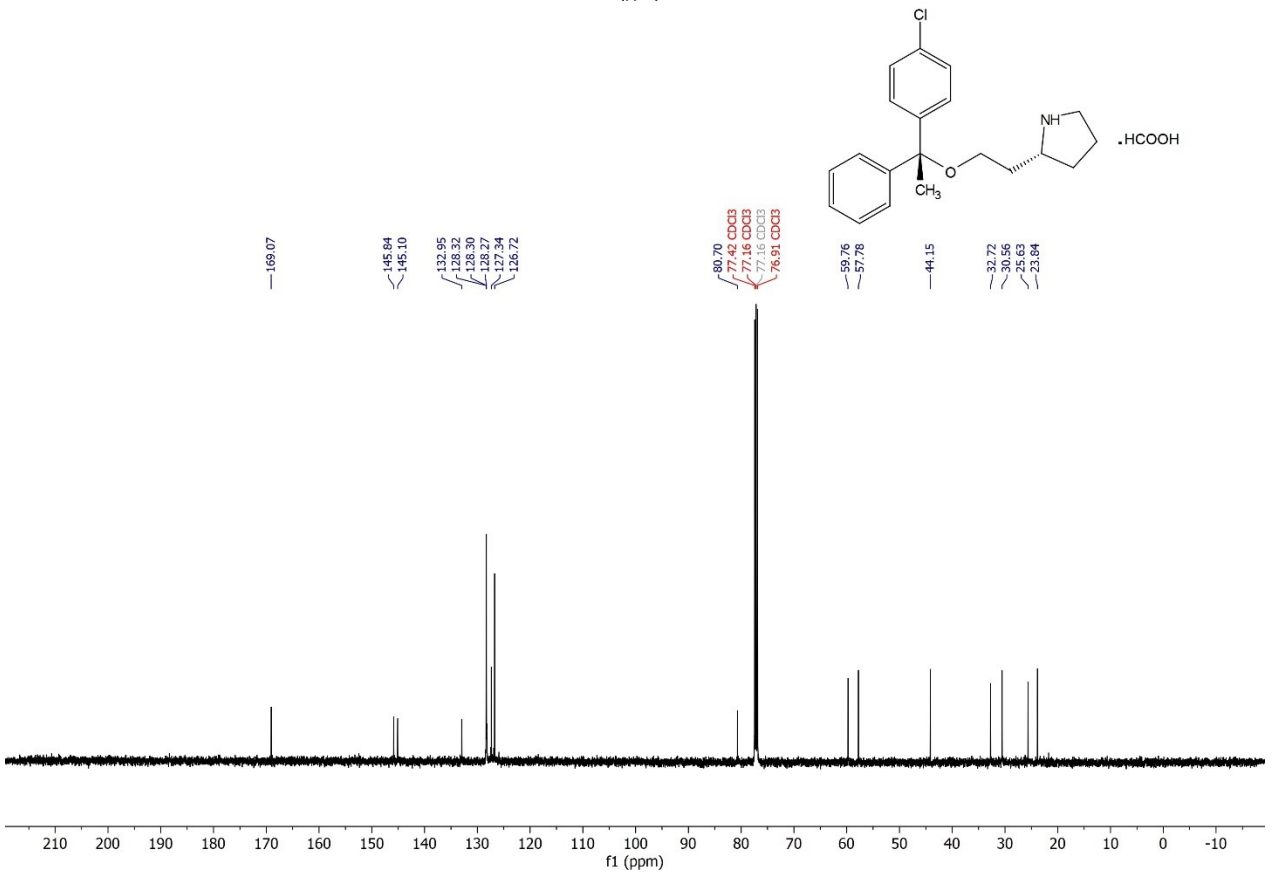

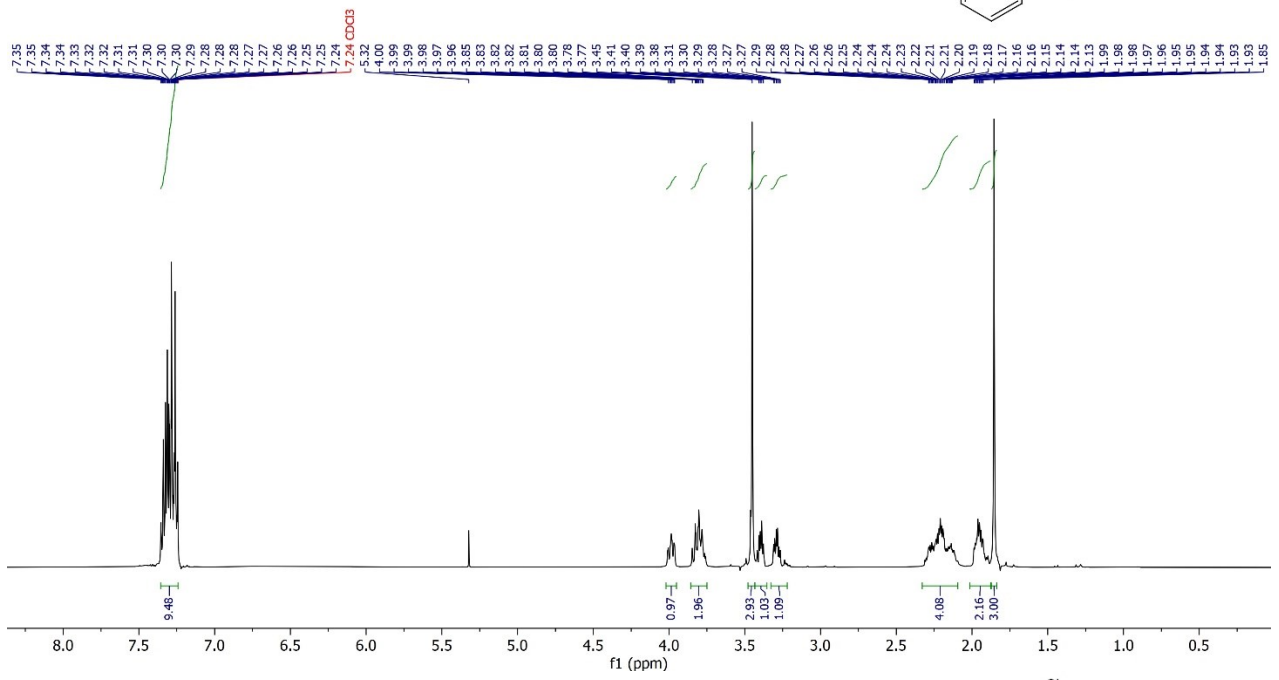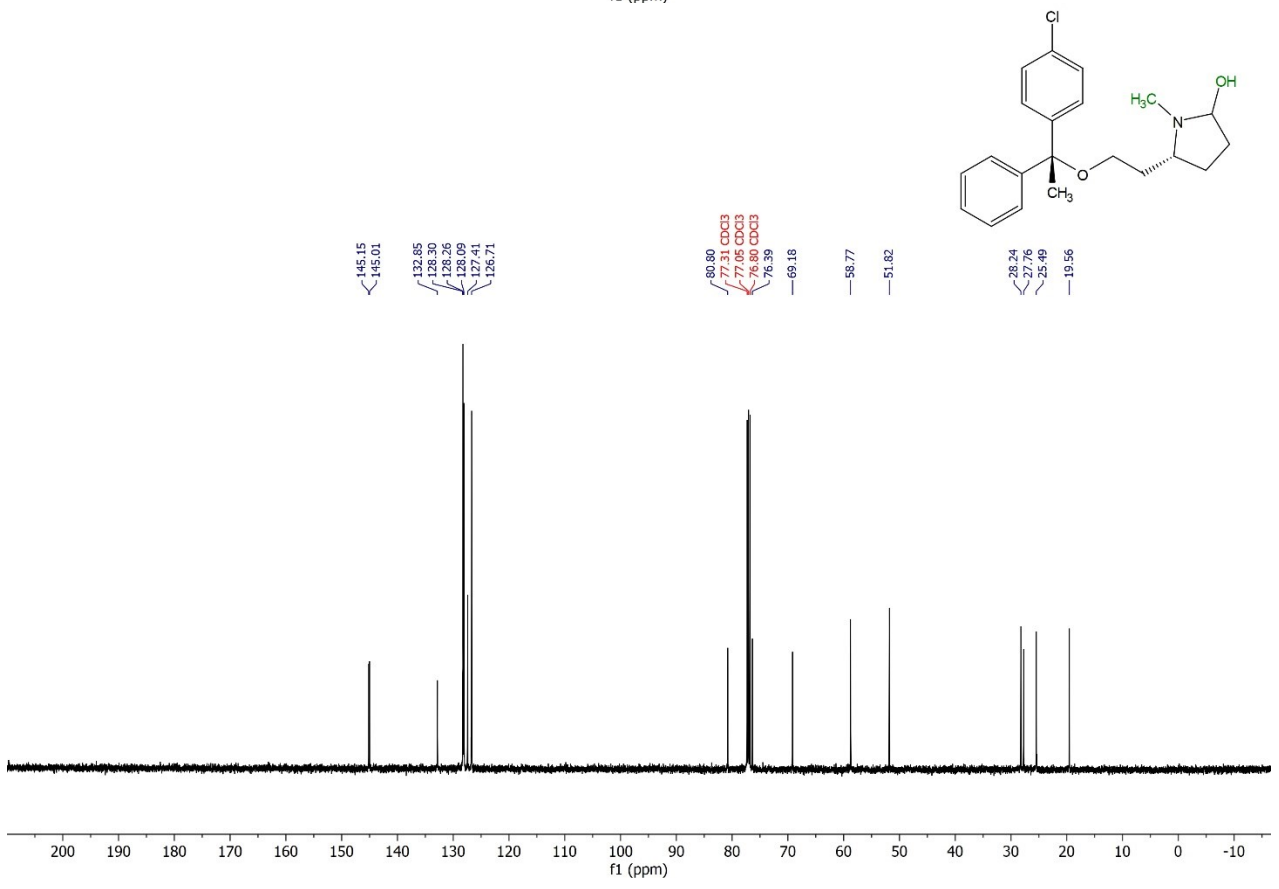

## <sup>1</sup>H NMR of gram-scale synthesized noratropine (Table 5, entry 1)

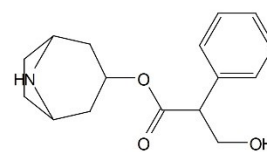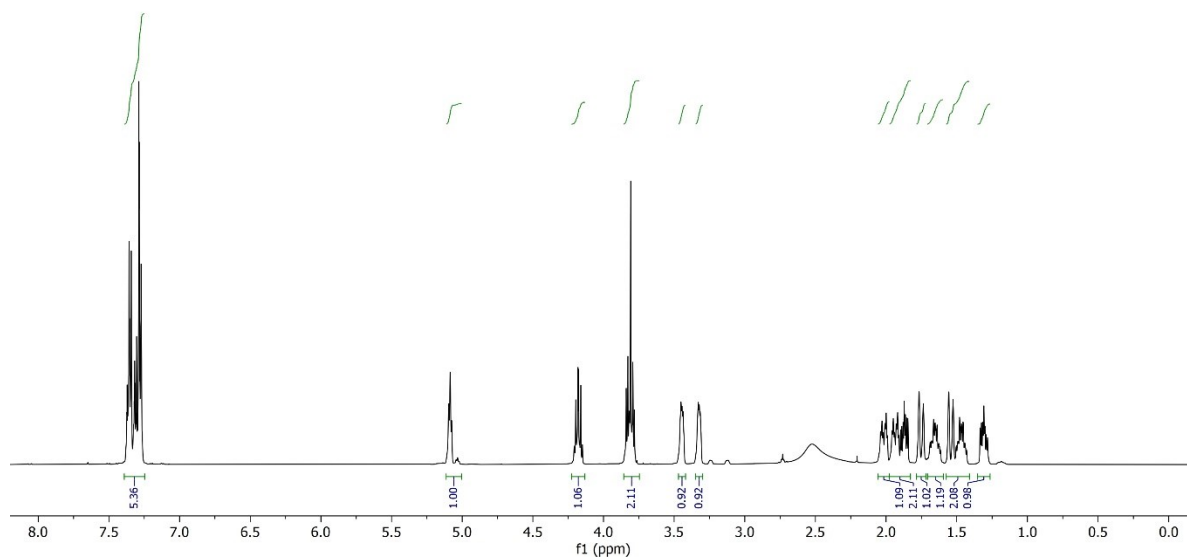

## References

- 1 D. D. Do Pham, G. F. Kelso, Y. Yang and M. T. W. W. Hearn, *Green Chem.*, 2012, **14**, 1189–1195.
- 2 D. D. Do Pham, G. F. Kelso, Y. Yang and M. T. W. Hearn, *Green Chem.*, 2014, **16**, 1399–1409.
- 3 J. P. Barham, M. P. John and J. A. Murphy, *J. Am. Chem. Soc.*, 2016, **138**, 15482–15487.
- 4 E. Edink, A. Akdemir, C. Jansen, R. Van Elk, O. Zuiderveld, F. J. J. De Kanter, J. E. Van Muijlwijk-Koezen, A. B. Smit, R. Leurs and I. J. P. De Esch, *Bioorganic Med. Chem. Lett.*, 2012, **22**, 1448–1454.
- 5 G. Maksay, P. Nemes and T. Biró, *J. Med. Chem.*, 2004, **47**, 6384–6391.
- 6 A. M. Nauth, A. Lipp, B. Lipp and T. Opatz, *European J. Org. Chem.*, 2017, **2017**, 2099–2103.
- 7 J. C. Orejarena Pacheco, A. Lipp, A. M. Nauth, F. Acke, J. P. Dietz and T. Opatz, *Chem. - A Eur. J.*, 2016, **22**, 5409–5415.
